# Supplementary material for: Macrocyclic squaramides as ion pair receptors and fluorescent sensors selective towards sulfates
Source: Royal Society of Chemistry journal article supplement (doi:10.1039/d0dt04273k), 2021-01-01
Supplement: d0dt04273k1.pdf [file d0dt04273k1.pdf]

## Macrocyclic squaramides as ion pair receptors and fluorescent sensors selective towards sulfates

Marta Zaleskaya, Damian Jagleniec and Jan Romański\*

\*Faculty of Chemistry, University of Warsaw, Pasteura 1, PL 02-093 Warsaw, Poland

\*jarom@chem.uw.edu.pl

### Table of Contents

|                                                      |            |
|------------------------------------------------------|------------|
| <b>1. General information</b>                        | <b>S1</b>  |
| <b>2. NMR titration experiments</b>                  | <b>S2</b>  |
| <b>3. DOSY, ROESY and HSQC experiments</b>           | <b>S10</b> |
| <b>4. UV-Vis and Emission spectra</b>                | <b>S12</b> |
| <b>5. Molecular modelling</b>                        | <b>S15</b> |
| <b>6. NMR spectra of newly synthesised compounds</b> | <b>S22</b> |

### General information

Unless specifically indicated, all other chemicals and reagents used in this study were purchased from commercial sources and used as received. If necessary purification of products was performed using column chromatography on silica gel (Merck Kieselgel 60, 230-400 mesh) with mixtures of chloroform/methanol. Thin-layer chromatography (TLC) was performed on silica gel plates (Merck Kieselgel 60 F254).

$^1\text{H}$  and  $^{13}\text{C}$  NMR spectra used in the characterization of products were recorded on Bruker 300 spectrometer using a residual protonated solvent as internal standard.

$^1\text{H}$  NMR DOSY, ROESY and HSQC experiments were conducted at 298 K on Varian VNMRS 600 MHz instruments with a residual solvent signal as an internal standard.

Mass spectra were measured on Quattro LC Micromass or Shimadzu LCMS-IT-TOF unit.

UV-vis analyses were performed using Thermo Spectronic Unicam UV500 Spectrophotometer.

### NMR titration experiments

The  $^1\text{H}$  NMR titration was conducted at 298K in  $\text{DMSO-d}_6$ . In each case, a 500  $\mu\text{L}$  of freshly prepared 2.0 mM solution of **R1** (1.6 mM of **R3**; 1.7 mM of **R4**) was added to a 5 mm NMR tube. In the case of ion pair titration receptor was firstly pretreated with one or three equivalent of  $\text{KPF}_6$  or  $\text{NaClO}_4$ . Then small aliquots of solution of TBAX, containing receptor at constant concentration, were added and a spectrum was acquired after each addition. The resulting titration data were analyzed using BindFit (v0.5) package, available online at <http://supramolecular.org>. Each titration was carried out in duplicate. Reported values are calculated as weighted arithmetic mean, where the weights were the errors obtained for each value separately. The given uncertainty of the association constants is the largest of the variance (external or internal).

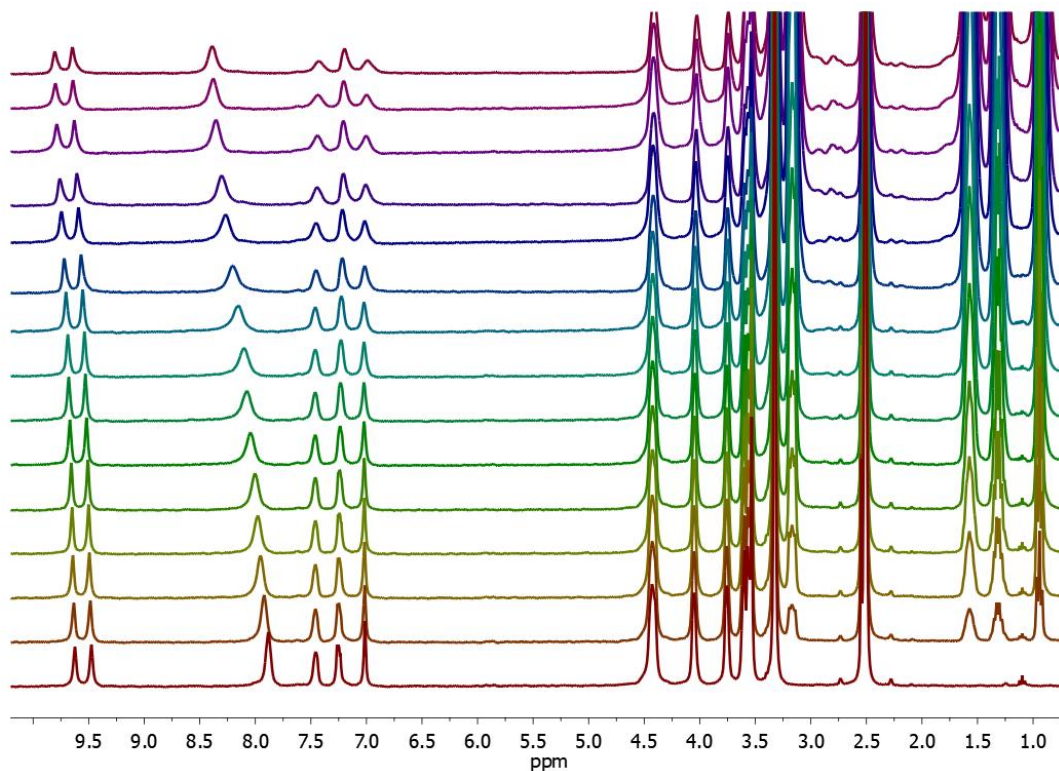

**Fig. S1.** Typical  $^1\text{H}$  NMR spectra recorded upon titration of **R1** in  $\text{DMSO-d}_6$  with TBAXI.

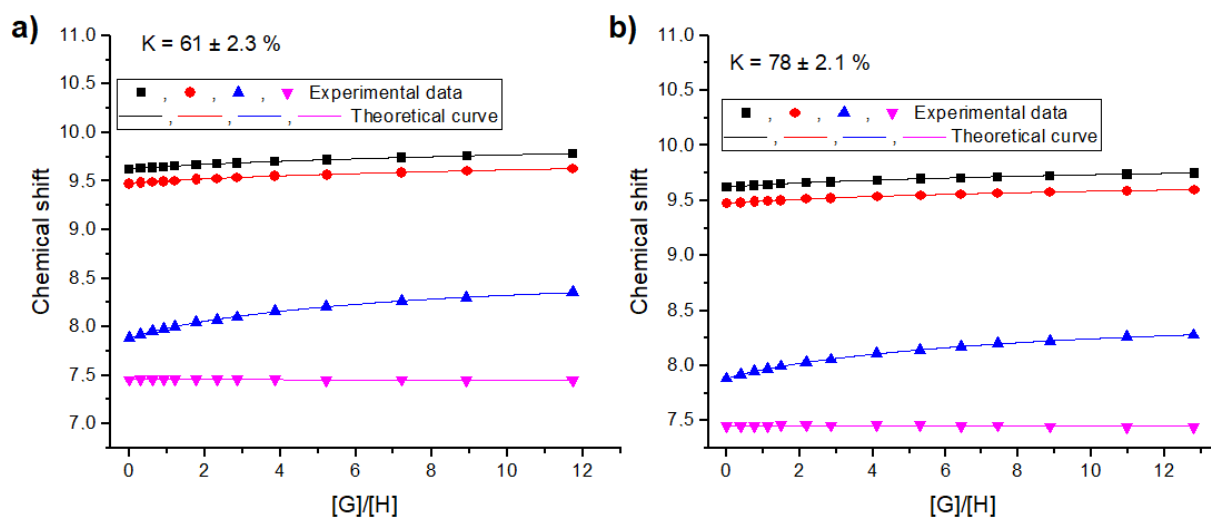

**Fig. S2.**  $^1\text{H}$  NMR titration binding isotherms of **R1** in  $\text{DMSO-d}_6$  upon addition of increasing amounts of TBACl (a) and of TBACl in the presence of 1 equiv.  $\text{NaClO}_4$  (b).

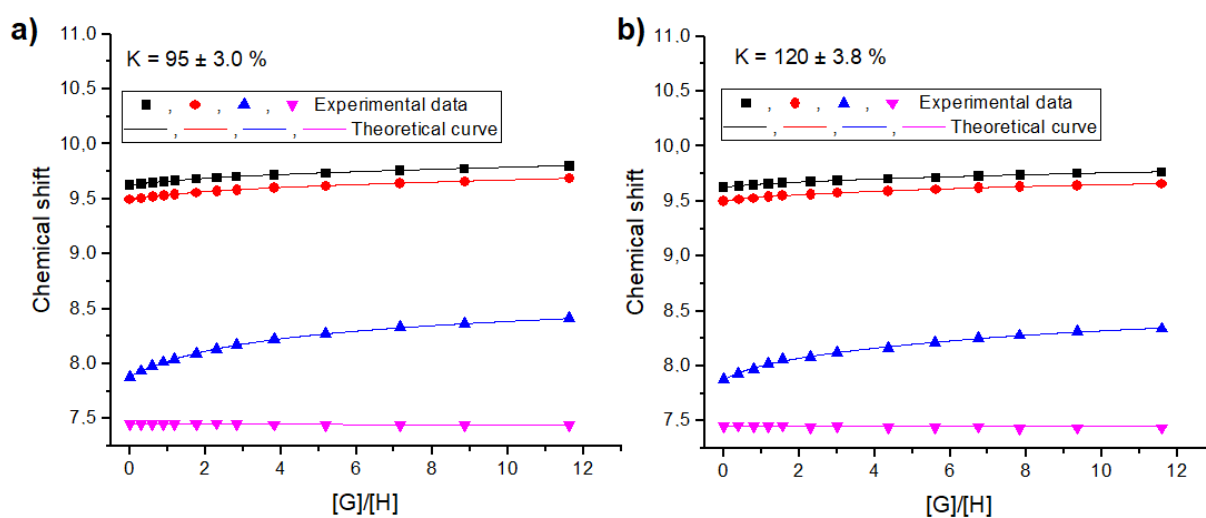

**Fig. S3.**  $^1\text{H}$  NMR titration binding isotherms of **R1** in  $\text{DMSO-d}_6$  upon addition of increasing amounts of TBACl in the presence of 1 equiv.  $\text{KPF}_6$  (a) and of TBACl in the presence of 3 equiv.  $\text{KPF}_6$  (b).

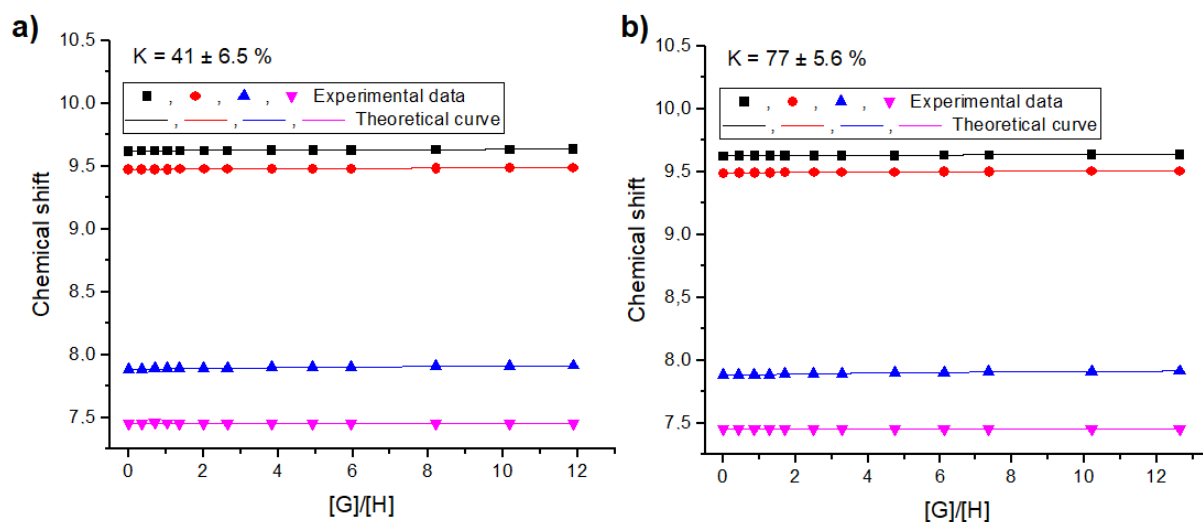

**Fig. S4.**  $^1\text{H}$  NMR titration binding isotherms of **R1** in  $\text{DMSO-d}_6$  upon addition of increasing amounts of TBABr (a) and of TBABr in the presence of 1 equiv.  $\text{KPF}_6$  (b).

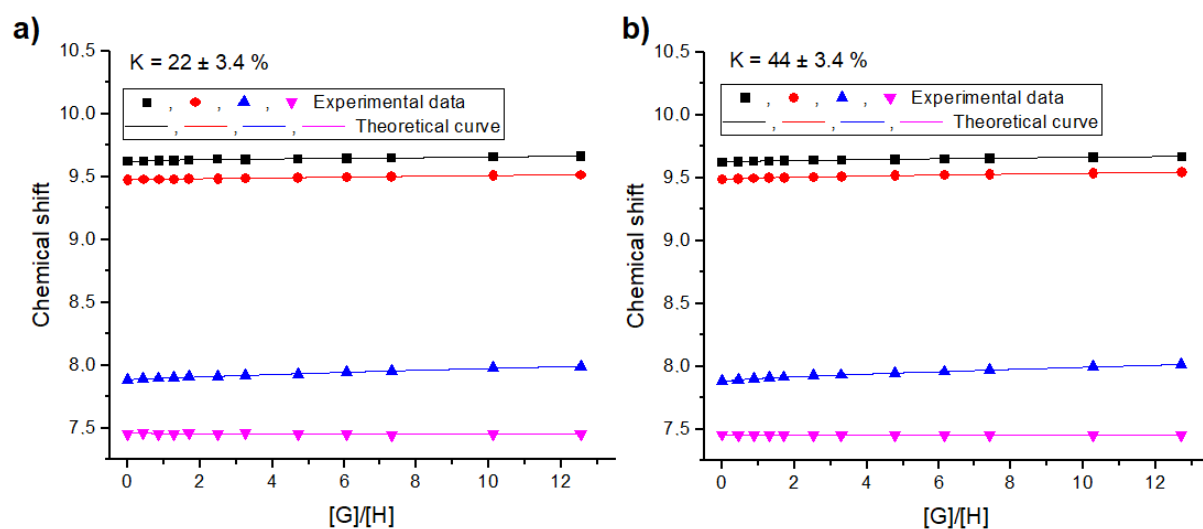

**Fig. S5.**  $^1\text{H}$  NMR titration binding isotherms of **R1** in  $\text{DMSO-d}_6$  upon addition of increasing amounts of  $\text{TBANO}_2$  (a) and of  $\text{TBANO}_2$  in the presence of 1 equiv.  $\text{KPF}_6$  (b).

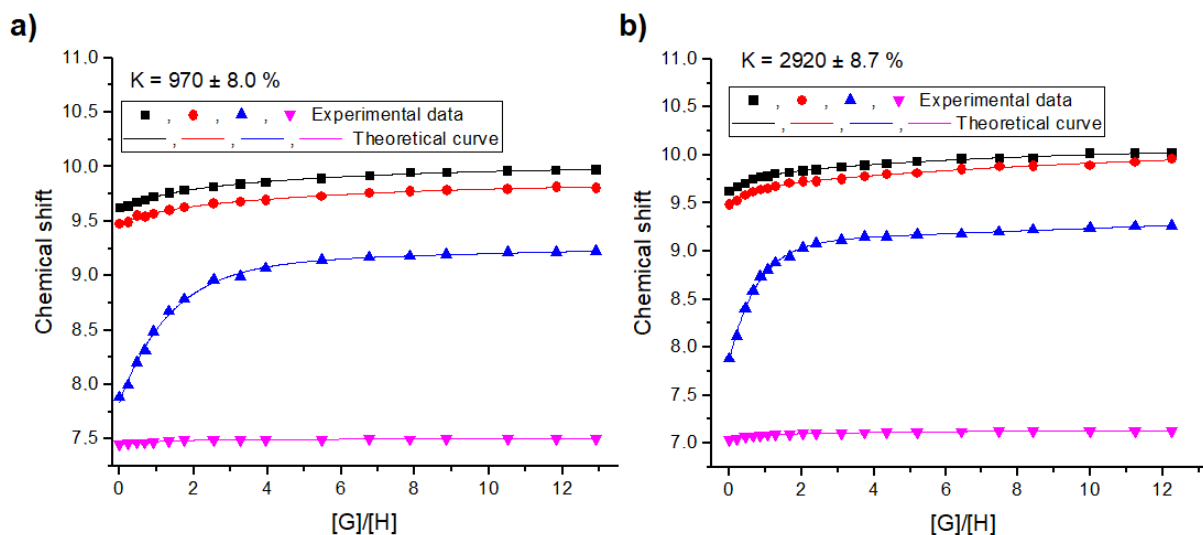

**Fig. S6.**  $^1H$  NMR titration binding isotherms of **R1** in  $DMSO-d_6$  upon addition of increasing amounts of TBAPhCOO (a) and of TBAPhCOO in the presence of 1 equiv.  $KPF_6$  (b).

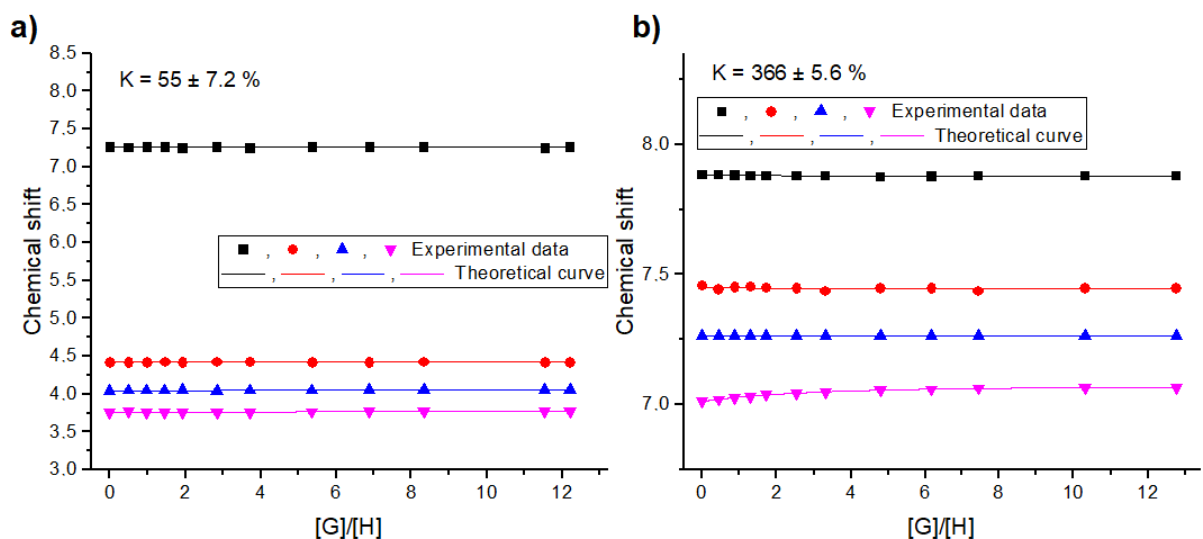

**Fig. S7.**  $^1H$  NMR titration binding isotherms of **R1** in  $DMSO-d_6$  upon addition of increasing amounts of  $NaClO_4$  (a) and of  $KPF_6$  (b).

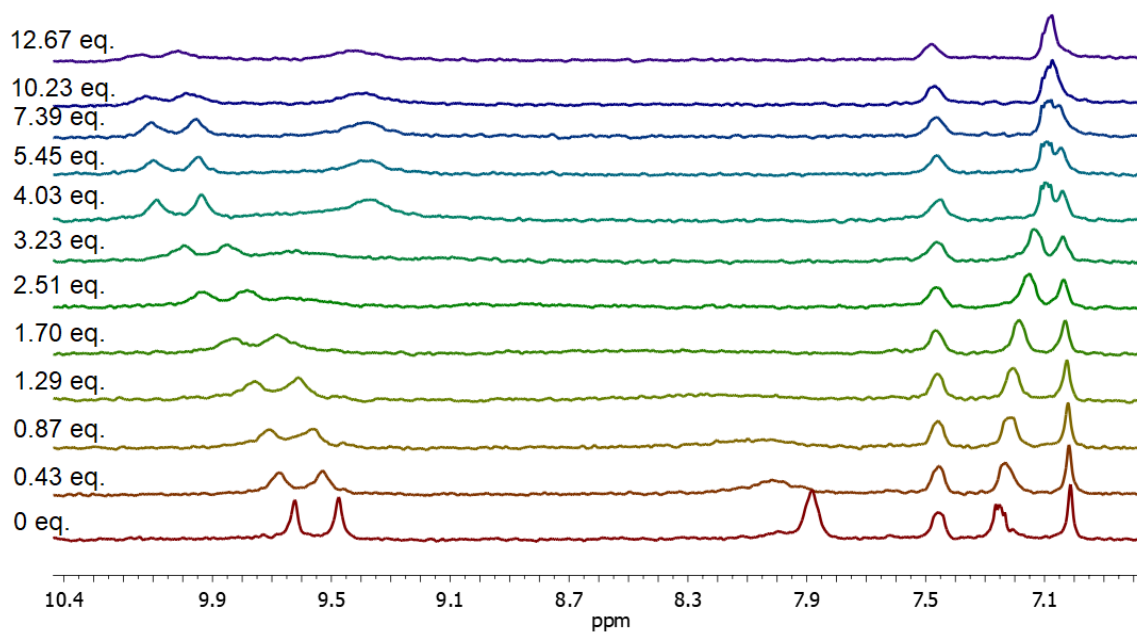

**Fig. S8.** Partial  $^1\text{H}$ NMR spectra recorded upon titration of **R1** in  $\text{DMSO-d}_6$  with  $\text{TBA}_2\text{SO}_4$  (signals corresponding to amide and phenyl protons).

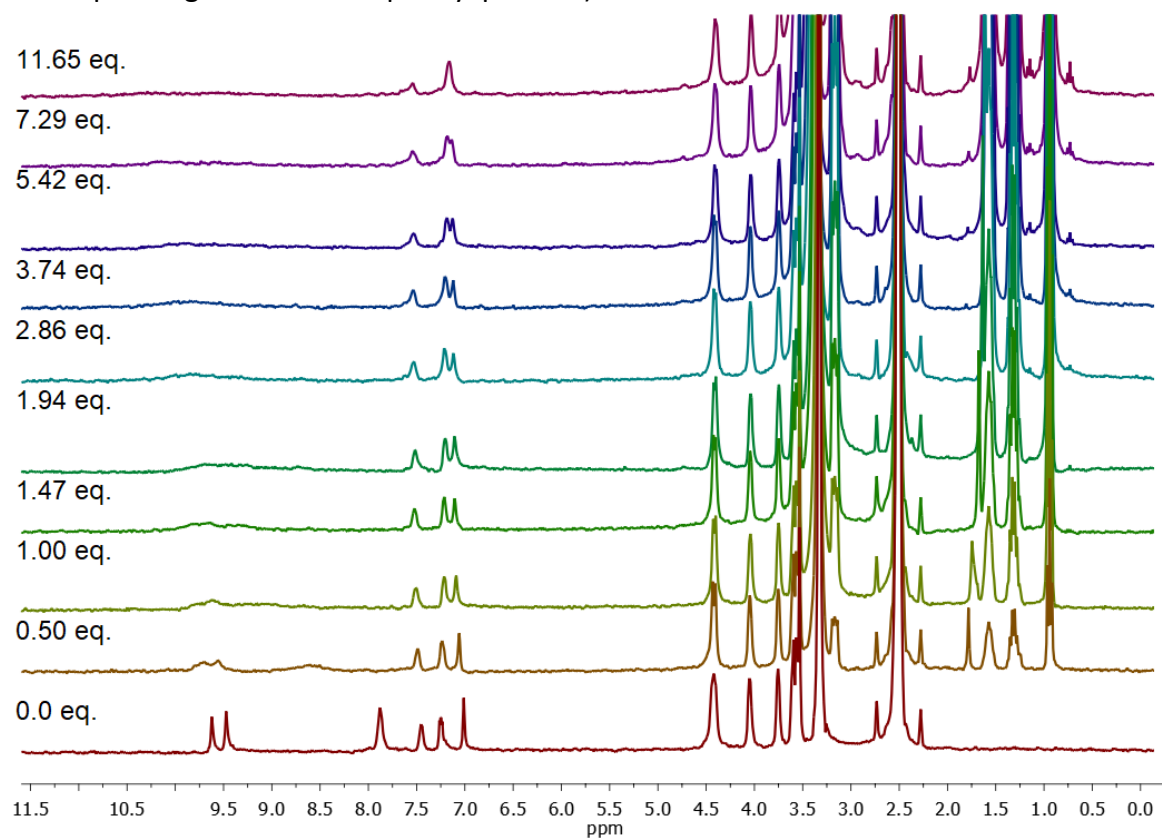

**Fig. S9.**  $^1\text{H}$  NMR spectra recorded upon titration of **R1** in  $\text{DMSO-d}_6$  with  $\text{TBACH}_3\text{COO}$ .

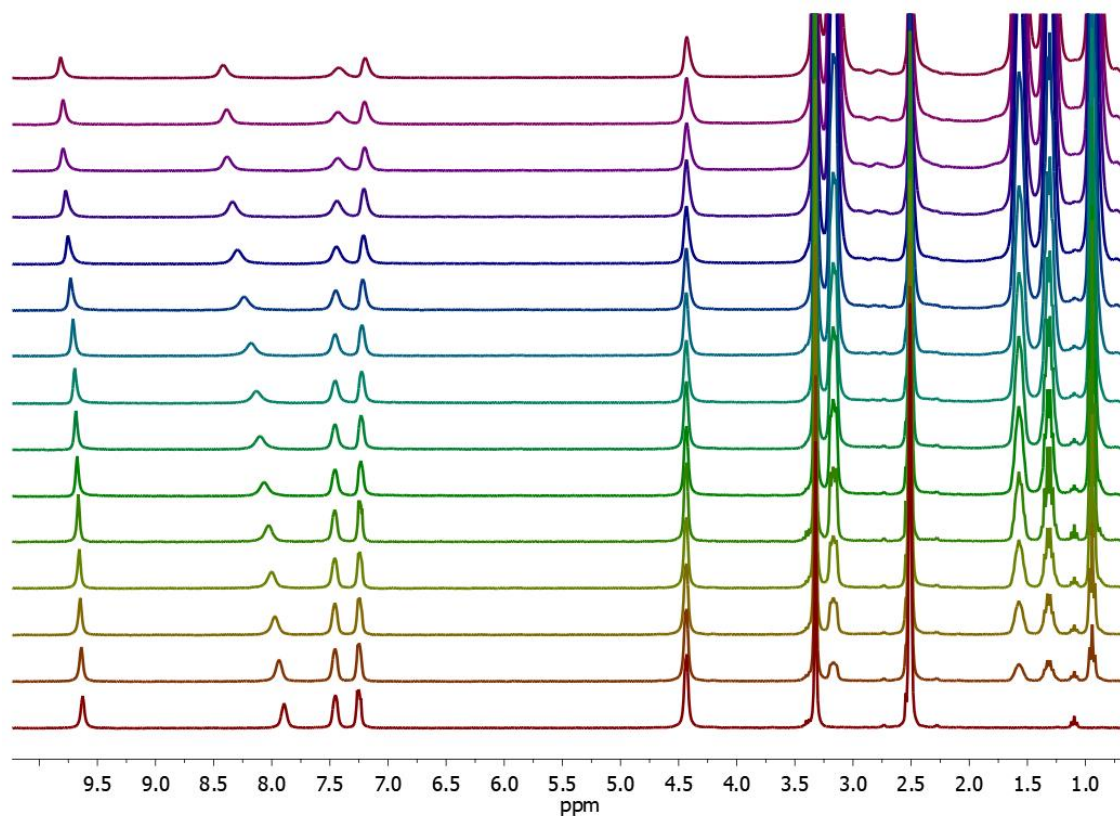

**Fig. S10.** Typical  $^1\text{H}$  NMR spectra recorded upon titration of **R3** in  $\text{DMSO-d}_6$  with TBACl.

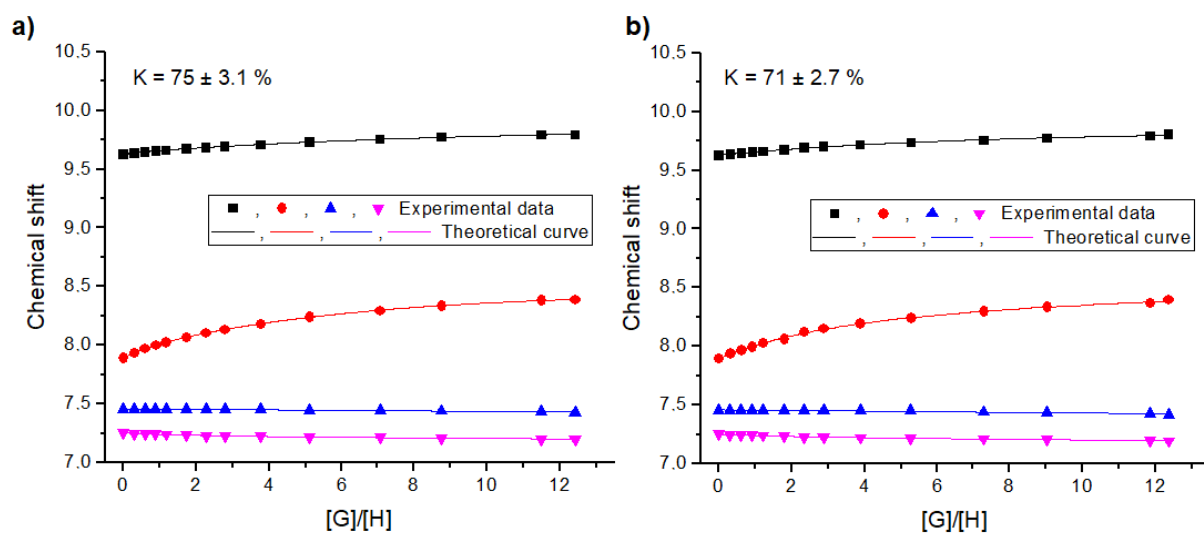

**Fig. S11.**  $^1\text{H}$  NMR titration binding isotherms of **R3** in  $\text{DMSO-d}_6$  upon addition of increasing amounts of TBACl (a) and of TBACl in the presence of 1 equiv.  $\text{KPF}_6$  (b).

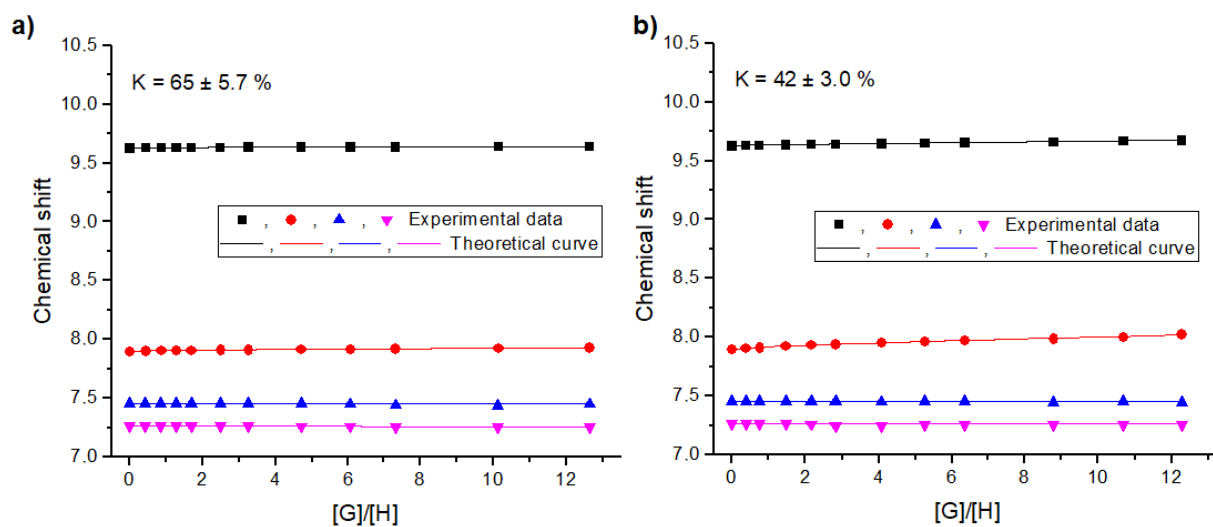

**Fig. S12.** <sup>1</sup>H NMR titration binding isotherms of **R3** in DMSO-d<sub>6</sub> upon addition of increasing amounts of TBABr (a) and of TBANO<sub>2</sub> (b).

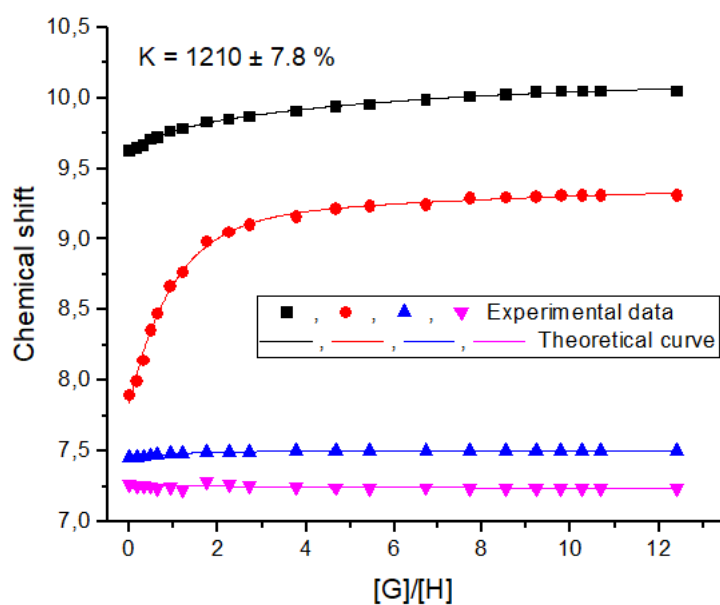

**Fig. S13.** <sup>1</sup>H NMR titration binding isotherms of **R3** in DMSO-d<sub>6</sub> upon addition of increasing amounts of TBAPhCOO.



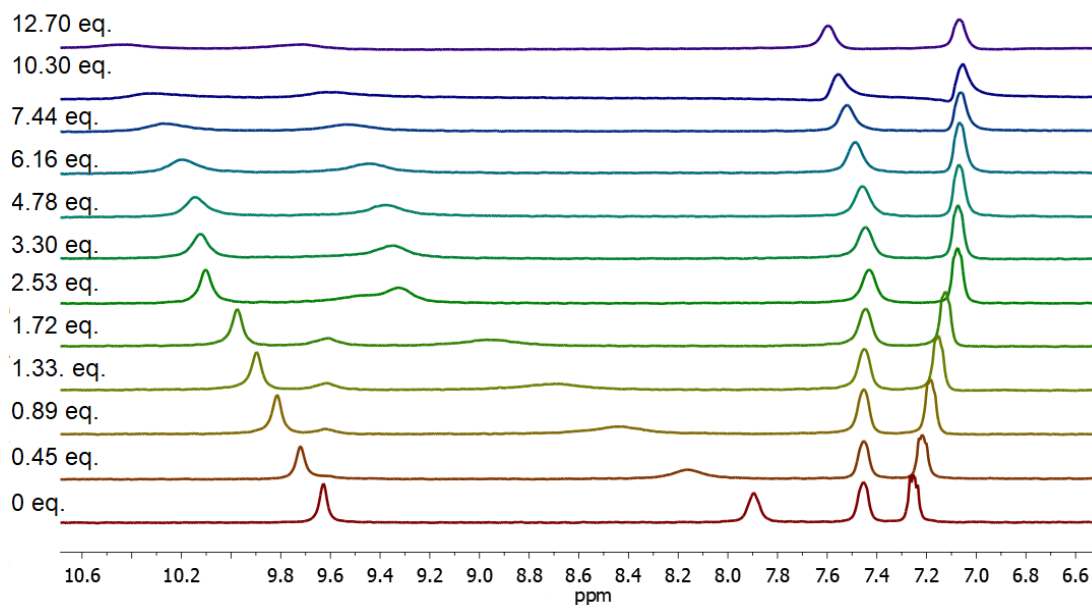

**Fig. S14.** Partial  $^1\text{H}$ NMR spectra recorded upon titration of **R3** in  $\text{DMSO-d}_6$  with  $\text{TBA}_2\text{SO}_4$  (signals corresponding to amide and phenyl protons).

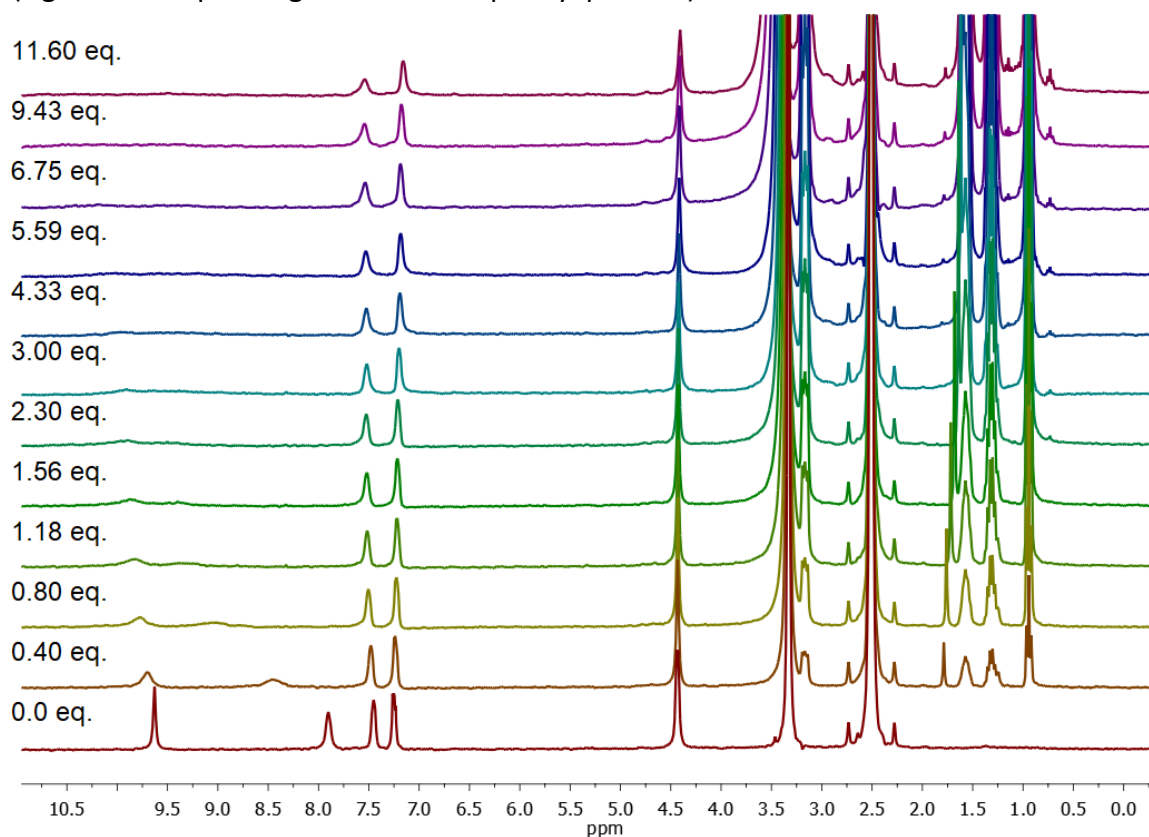

**Fig. S15.**  $^1\text{H}$  NMR spectra recorded upon titration of **R3** in  $\text{DMSO-d}_6$  with  $\text{TBACH}_3\text{COO}$ .

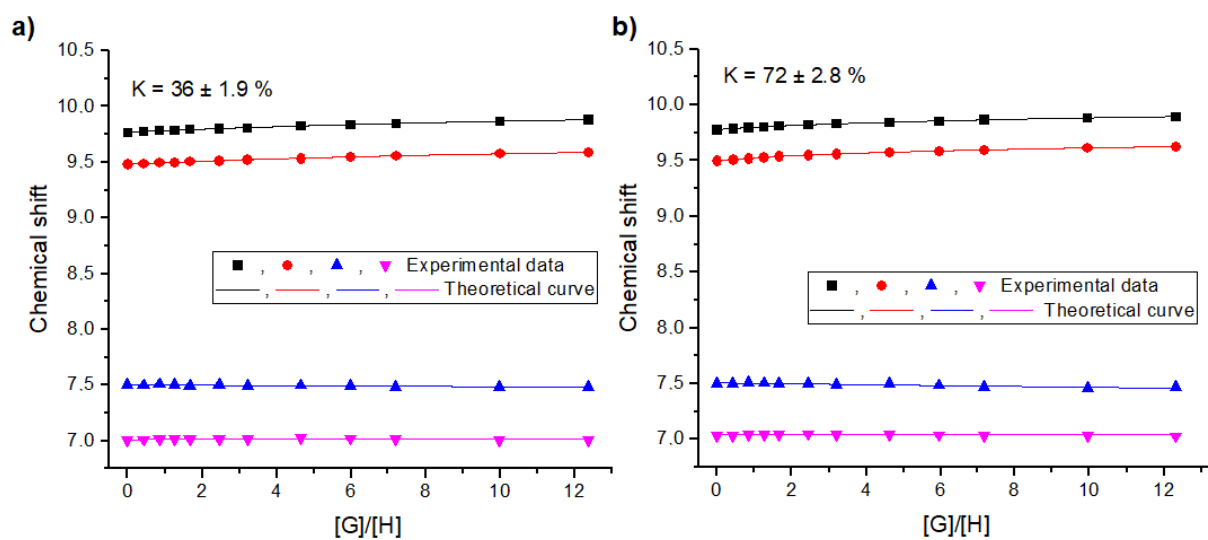

**Fig. S16.** <sup>1</sup>H NMR titration binding isotherms of **R4** in DMSO-d<sub>6</sub> upon addition of increasing amounts of TBACl (a) and of TBACl in the presence of 1 equiv. KPF<sub>6</sub> (b).

#### DOSY, ROESY and HSQC experiments

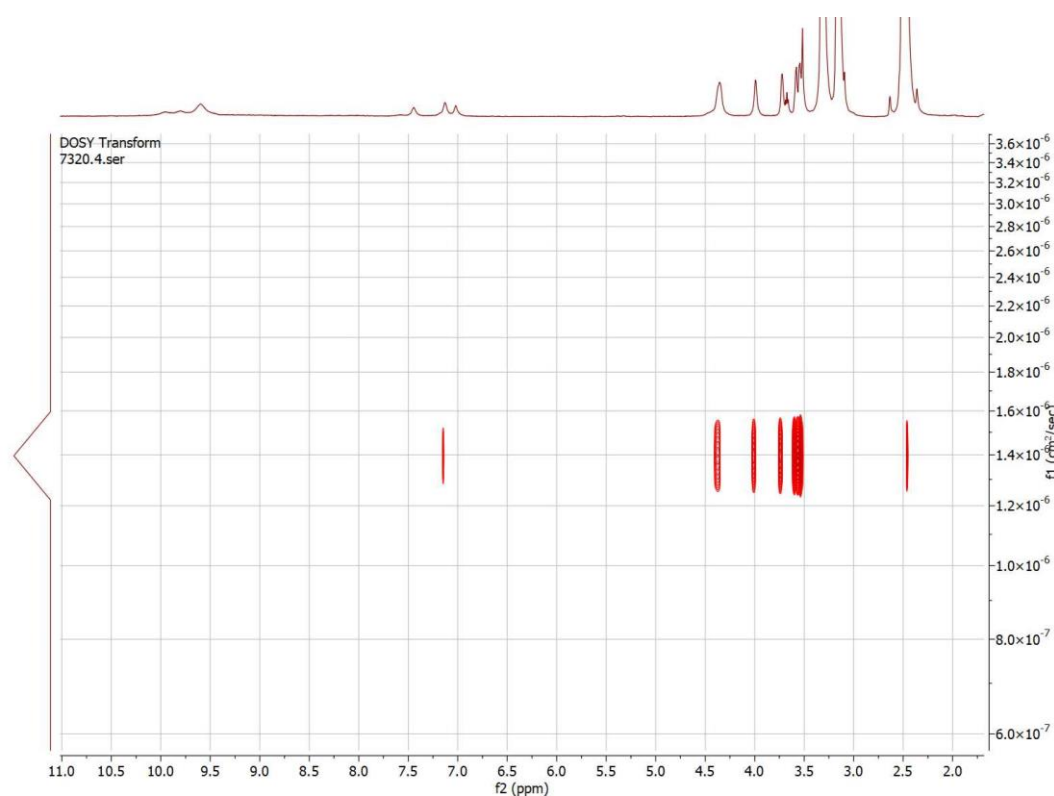

**Fig. S17.** DOSY experiment of **R1** (1.5 mM) + 3.2 eq. TBA<sub>2</sub>SO<sub>4</sub> in DMSO-d<sub>6</sub>.

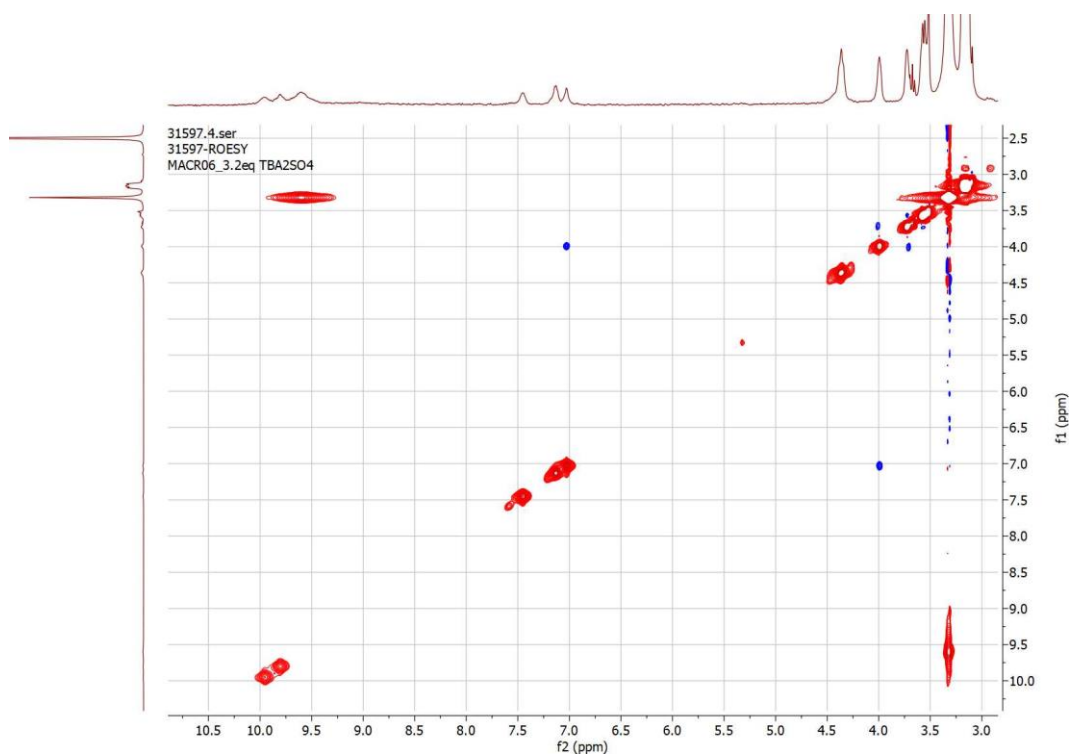

**Fig. S18.** ROESY NMR spectrum of **R1** (1.5 mM) + 3.2 eq. TBA<sub>2</sub>SO<sub>4</sub> in DMSO-d<sub>6</sub>.

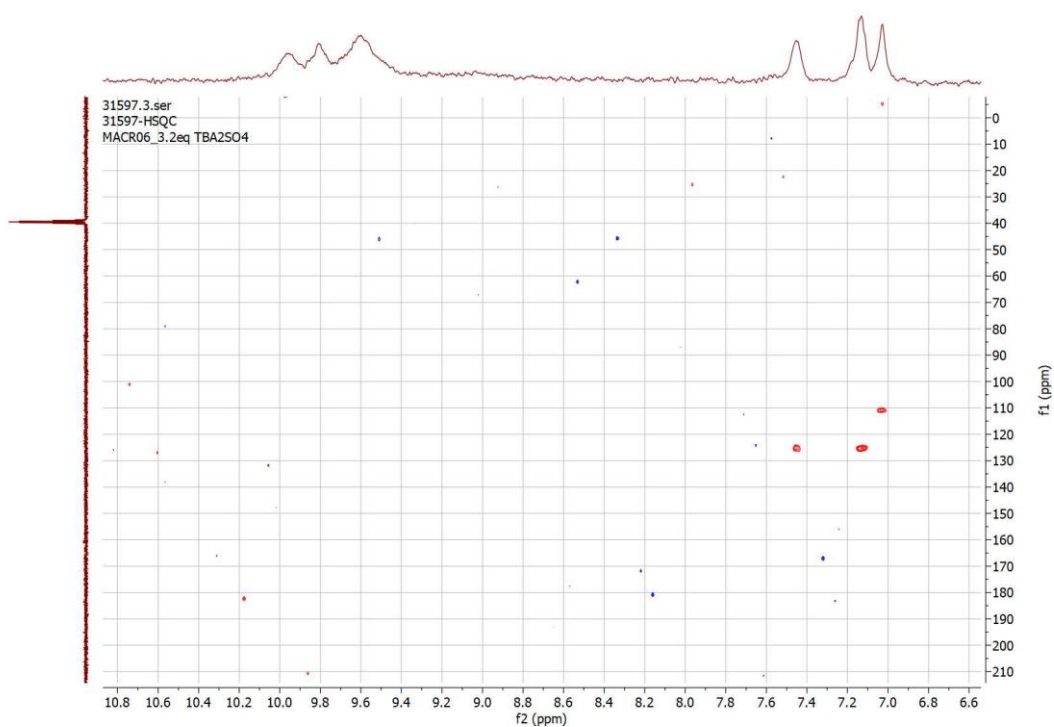

**Fig. S19.** HSQC NMR spectrum of **R1** (1.5 mM) + 3.2 eq. TBA<sub>2</sub>SO<sub>4</sub> in DMSO-d<sub>6</sub>.

### UV-Vis and Emission spectra

UV-vis experiments were performed on a Thermo Spectronic Unicam UV 500 spectrophotometer in DMSO solution at 298K. To 10 mm cuvette was added 2.5 mL of freshly prepared solution of **R4** ( $c=1.0 \times 10^{-5}$  M) and small aliquots of TBAX solution containing **R4** at the same concentration as in cuvette, were added and a spectrum was acquired after each addition.

Fluorescence emission spectra were measured on a Hitachi F-7100 Fluorescence Spectrophotometer. Solution of **R4** ( $c=1.0 \times 10^{-5}$  M) in DMSO were titration with small aliquots of TBAX solution containing **R4** at the same concentration as in cuvette. Successive scans were performed measuring fluorescence ( $\lambda_{\text{ex}}=340$  nm) emission between 355 and 650 nm.

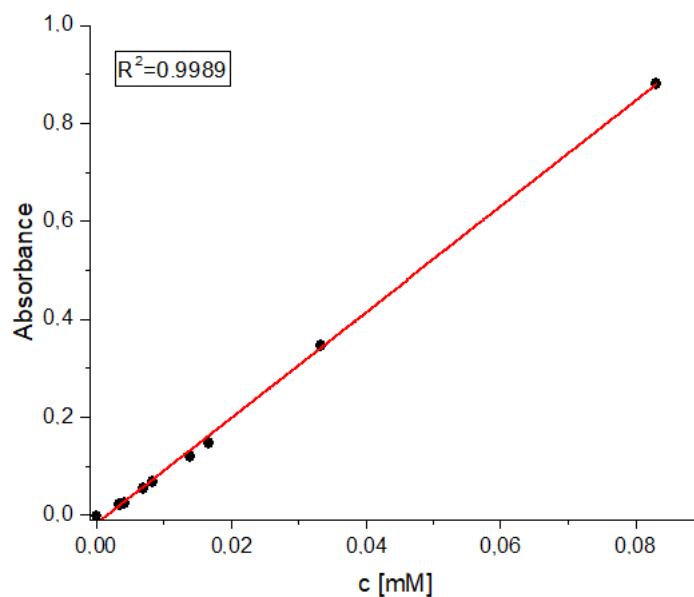

Fig. S20. Dilution curve of **R4** in DMSO.

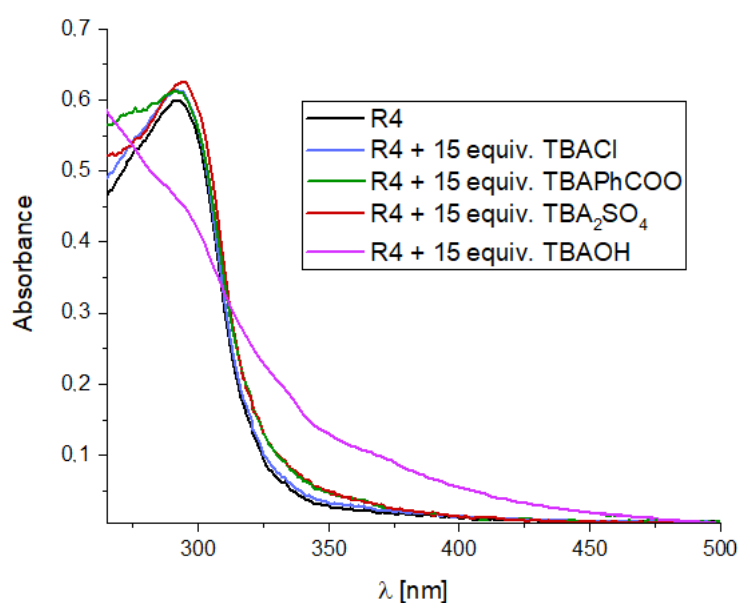

Fig. S21. UV-Vis absorption spectra of **R4** ( $1.0 \times 10^{-5}$  M) and upon addition of TBA salts.

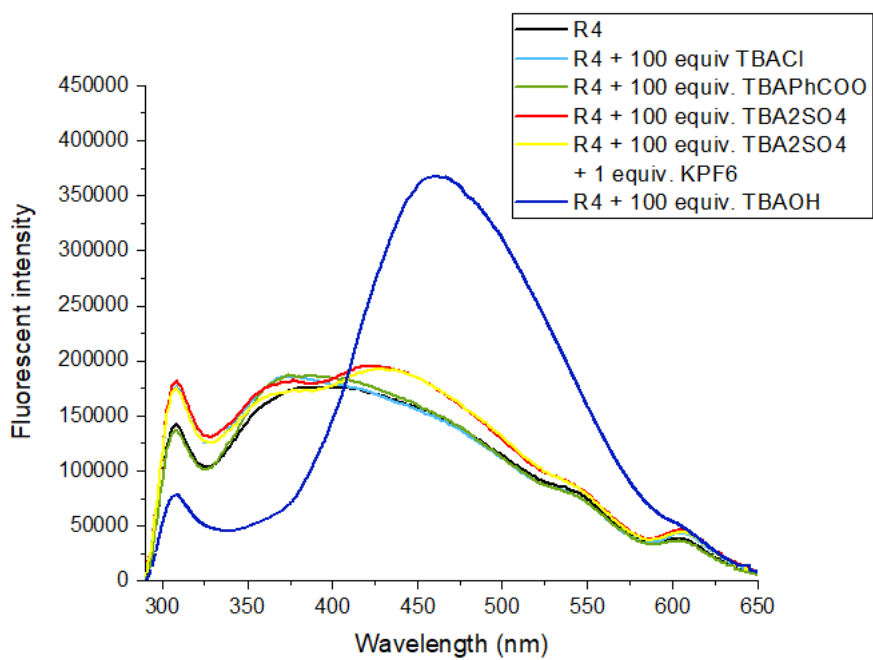

**Fig. S22.** Emission spectra of R4 ( $1.0 \times 10^{-5}$  M) and upon addition of TBA salts (excitation at 300 nm).

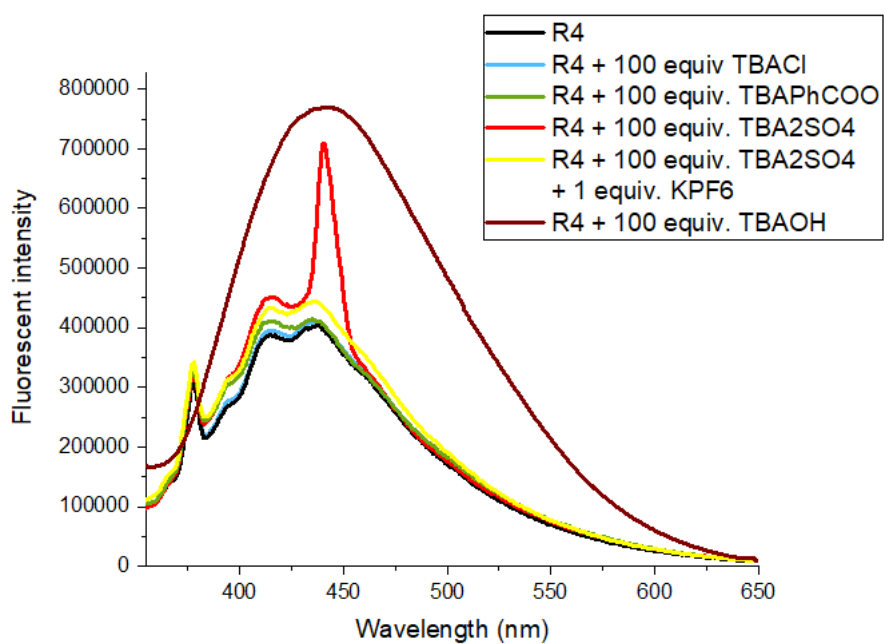

**Fig. S23.** Emission spectra of R4 ( $1.0 \times 10^{-5}$  M) and upon addition of TBA salts (excitation at 340 nm).

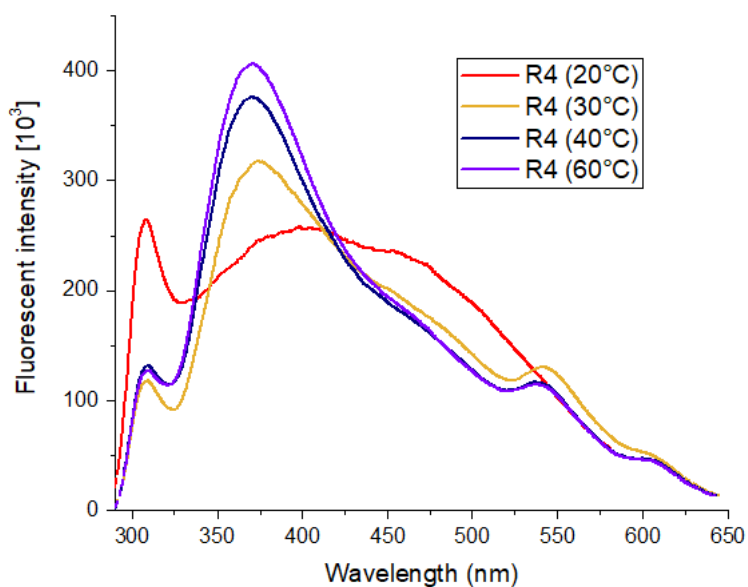

**Fig. S24.** Emission spectra of **R4** ( $1.0 \times 10^{-5}$  M)  $\lambda$  excitation = 300 nm.

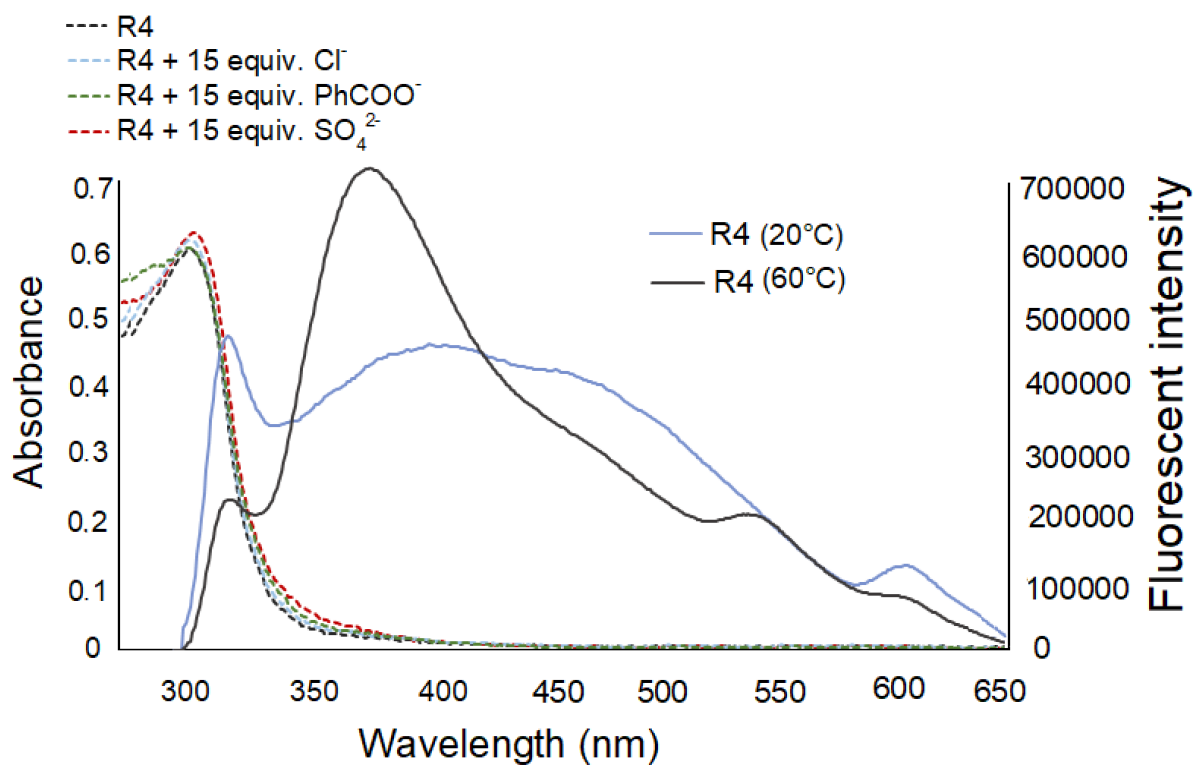

**Fig. S25.** UV-Vis absorption and emission (excitation at 300 nm) spectra of **R4** ( $1.0 \times 10^{-5}$  M) and upon addition of TBA salts in DMSO.

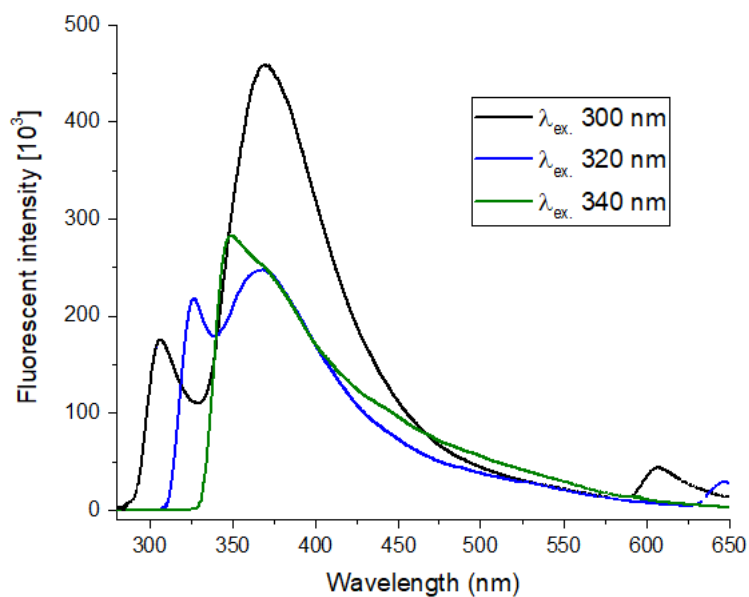

**Fig. S26.** Emission spectra of **A3** ( $1.0 \times 10^{-5}$  M) in DMSO.

### Molecular modelling

Molecular modelling of receptor **R3** was performed using Spartan 10 for Windows (Wavefunction, Inc. Irvine, CA). The structure of receptor **R3** was energy minimized using molecular mechanics and  $\text{Cl}^-$ ,  $\text{SO}_4^{2-}$  and  $\text{PhCOO}^-$  molecule was placed into the center of macrocycle and the optimized by density functional theory (DFT) calculations was performed at B3LYP/6-31G\* level of theory.

**Table S1:** Atomic coordinates for complex **R3** and TBACl.

|      |          |          |          |     |          |          |          |
|------|----------|----------|----------|-----|----------|----------|----------|
| Atom | X        | Y        | Z        | 26H | 1,80796  | -4,08323 | 1,990317 |
| 1O   | 5,67984  | -2,71472 | 1,136771 | 27C | -2,41642 | 3,493534 | 1,648313 |
| 2O   | 6,246003 | 0,547883 | 1,033326 | 28H | -2,08956 | 3,986783 | 2,574314 |
| 3N   | 2,519691 | -2,12896 | 1,755624 | 29H | -3,4329  | 3,836314 | 1,436272 |
| 4H   | 1,626888 | -1,62565 | 1,801118 | 30C | -1,51759 | 4,028645 | 0,523257 |
| 5N   | 3,056433 | 1,082999 | 1,691543 | 31O | -1,35265 | 5,228986 | 0,383273 |
| 6H   | 2,053331 | 0,905071 | 1,785223 | 32C | 3,175064 | 2,928259 | -0,01579 |
| 7C   | 3,614795 | -1,37721 | 1,562325 | 33C | 2,015541 | -3,62581 | -0,14286 |

|     |          |          |          |     |          |          |          |
|-----|----------|----------|----------|-----|----------|----------|----------|
| 8C  | 3,85002  | 0,012406 | 1,53926  | 34O | 4,056371 | 3,23689  | -0,81068 |
| 9C  | 5,294664 | -0,18425 | 1,255996 | 35O | 2,819466 | -3,61617 | -1,07289 |
| 10C | 5,032412 | -1,68791 | 1,29815  | 36N | 1,841762 | 2,98381  | -0,29282 |
| 11O | -6,14548 | -0,5807  | 0,817483 | 37H | 1,197306 | 2,719754 | 0,440589 |
| 12O | -5,48069 | 2,699489 | 0,843396 | 38N | 0,660624 | -3,66419 | -0,2967  |
| 13N | -3,11808 | -1,16205 | 1,848738 | 39H | 0,091987 | -3,56248 | 0,53756  |
| 14H | -2,1495  | -1,04835 | 2,140213 | 40C | -3,65183 | -2,49882 | 1,632225 |
| 15N | -2,44566 | 2,052222 | 1,813517 | 41H | -3,51315 | -3,1162  | 2,528985 |
| 16H | -1,59206 | 1,563987 | 2,070267 | 42H | -4,72821 | -2,41802 | 1,456029 |
| 17C | -3,81281 | -0,05566 | 1,525127 | 43C | -3,08298 | -3,29213 | 0,441042 |
| 18C | -3,53114 | 1,310156 | 1,517362 | 44O | -3,6095  | -4,33659 | 0,094205 |
| 19C | -4,90177 | 1,658065 | 1,071191 | 45N | -0,92771 | 3,077442 | -0,28233 |
| 20C | -5,20921 | 0,153726 | 1,068002 | 46H | -1,15586 | 2,099555 | -0,1128  |
| 21C | 3,516799 | 2,439752 | 1,408424 | 47N | -1,94969 | -2,77483 | -0,15758 |
| 22H | 4,603566 | 2,466025 | 1,490075 | 48H | -1,61778 | -1,86176 | 0,149427 |
| 23H | 3,086988 | 3,125368 | 2,149155 | 49H | -0,76087 | 4,515044 | -4,65585 |
| 24C | 2,477163 | -3,52426 | 1,323388 | 50C | -0,21293 | 4,202594 | -3,7706  |
| 25H | 3,482675 | -3,94453 | 1,389021 | 51C | 1,199067 | 3,401879 | -1,47707 |
| 52C | 1,181669 | 4,17763  | -3,77025 |     |          |          |          |
| 53C | -0,90182 | 3,830982 | -2,61598 |     |          |          |          |
| 54C | -0,21237 | 3,430761 | -1,47309 |     |          |          |          |
| 55C | 1,892381 | 3,783559 | -2,63646 |     |          |          |          |
| 56H | 1,731942 | 4,481699 | -4,66006 |     |          |          |          |
| 57H | -1,98886 | 3,855604 | -2,58182 |     |          |          |          |



|      |          |          |          |  |  |  |  |
|------|----------|----------|----------|--|--|--|--|
| 58H  | 2,974179 | 3,779471 | -2,62542 |  |  |  |  |
| 59C  | -0,09502 | -3,66784 | -1,48843 |  |  |  |  |
| 60C  | -1,74886 | -3,77226 | -3,75128 |  |  |  |  |
| 61C  | 0,42365  | -4,09252 | -2,71954 |  |  |  |  |
| 62C  | -1,44486 | -3,26905 | -1,40054 |  |  |  |  |
| 63C  | -2,26329 | -3,33996 | -2,53006 |  |  |  |  |
| 64C  | -0,40441 | -4,13641 | -3,84227 |  |  |  |  |
| 65H  | 1,461284 | -4,39272 | -2,77904 |  |  |  |  |
| 66H  | -3,30453 | -3,04974 | -2,43939 |  |  |  |  |
| 67H  | 0,006448 | -4,47871 | -4,78863 |  |  |  |  |
| 68H  | -2,3925  | -3,81631 | -4,62418 |  |  |  |  |
| 69Cl | -0,00958 | -0,11118 | 1,546503 |  |  |  |  |

**Table S2:** Atomic coordinates for complex **R3** and TBAPhCOO.

|      |          |          |          |     |          |          |          |
|------|----------|----------|----------|-----|----------|----------|----------|
| Atom | X        | Y        | Z        | 31O | -6,19197 | -0,26908 | -0,37784 |
| 1O   | 4,830755 | 2,931988 | -2,40522 | 32C | -1,96229 | 2,484849 | -1,71448 |
| 2O   | 1,813263 | 3,919161 | -3,48091 | 33C | 4,947466 | -0,51323 | -0,34943 |
| 3N   | 3,370045 | 1,416938 | 0,120149 | 34O | -3,03133 | 3,058478 | -1,60076 |
| 4H   | 2,659195 | 1,204268 | 0,8288   | 35O | 6,053465 | -0,84538 | -0,7514  |
| 5N   | 0,442102 | 2,258938 | -1,00853 | 36N | -1,82113 | 1,206937 | -2,22309 |
| 6H   | 0,391254 | 1,763861 | -0,11032 | 37H | -0,86425 | 0,913589 | -2,38902 |
| 7C   | 2,96099  | 2,102155 | -0,96487 | 38N | 3,837789 | -1,31779 | -0,34073 |
| 8C   | 1,704775 | 2,510653 | -1,42748 | 39H | 3,001498 | -0,95081 | 0,100263 |
| 9C   | 2,27675  | 3,241744 | -2,57917 | 40C | 0,741501 | -2,73832 | 2,797403 |

|     |          |          |          |     |          |          |          |
|-----|----------|----------|----------|-----|----------|----------|----------|
| 10C | 3,667052 | 2,793972 | -2,07917 | 41H | 1,109238 | -2,28119 | 3,722382 |
| 11O | -1,74379 | -4,93033 | 2,42917  | 42H | 0,374492 | -3,74197 | 3,039686 |
| 12O | -4,72368 | -3,51451 | 1,849549 | 43C | 1,954995 | -2,92291 | 1,878846 |
| 13N | -0,35329 | -1,96706 | 2,230002 | 44O | 3,058761 | -3,16982 | 2,333654 |
| 14H | -0,28855 | -0,94115 | 2,27687  | 45N | -3,96327 | -0,01185 | -0,902   |
| 15N | -3,24187 | -0,57934 | 1,725565 | 46H | -3,05518 | 0,114657 | -0,46996 |
| 16H | -2,57873 | 0,145037 | 2,014851 | 47N | 1,679183 | -2,83902 | 0,527879 |
| 17C | -1,60713 | -2,45523 | 2,154675 | 48H | 0,699741 | -2,72918 | 0,29038  |
| 18C | -2,85045 | -1,85863 | 1,909941 | 49H | -5,7465  | -1,00023 | -5,02203 |
| 19C | -3,56308 | -3,16188 | 1,957065 | 50C | -4,93224 | -0,56084 | -4,45159 |
| 20C | -2,19241 | -3,8149  | 2,221741 | 51C | -2,86694 | 0,580069 | -2,97059 |
| 21C | -0,64956 | 3,171848 | -1,32629 | 52C | -3,81172 | -0,05215 | -5,11048 |
| 22H | -0,34088 | 3,791376 | -2,1761  | 53C | -5,02224 | -0,52699 | -3,06241 |
| 23H | -0,87524 | 3,843322 | -0,48906 | 54C | -3,97871 | 0,025681 | -2,30407 |
| 24C | 4,725226 | 0,901625 | 0,225719 | 55C | -2,78841 | 0,527113 | -4,36295 |
| 25H | 5,405608 | 1,556011 | -0,32329 | 56H | -3,74167 | -0,08689 | -6,19393 |
| 26H | 5,030957 | 0,894566 | 1,278529 | 57H | -5,88644 | -0,92362 | -2,54728 |
| 27C | -4,63207 | -0,25204 | 1,446042 | 58H | -1,92189 | 0,964453 | -4,85219 |
| 28H | -4,87254 | 0,716718 | 1,89746  | 59C | 3,704331 | -2,6195  | -0,8477  |
| 29H | -5,29207 | -1,00397 | 1,884698 | 60C | 3,21522  | -5,15884 | -1,9514  |
| 30C | -5,01834 | -0,18524 | -0,04599 | 61C | 4,604499 | -3,17712 | -1,76834 |
| 62C | 2,574523 | -3,36586 | -0,45431 |     |          |          |          |
| 63C | 2,33548  | -4,62107 | -1,01384 |     |          |          |          |
| 64C | 4,353919 | -4,43587 | -2,30992 |     |          |          |          |

|     |          |          |          |  |  |  |  |
|-----|----------|----------|----------|--|--|--|--|
| 65H | 5,484999 | -2,6135  | -2,04411 |  |  |  |  |
| 66H | 1,459404 | -5,17618 | -0,68899 |  |  |  |  |
| 67H | 5,058183 | -4,85    | -3,02695 |  |  |  |  |
| 68H | 3,021776 | -6,1379  | -2,38037 |  |  |  |  |
| 69H | 0,549749 | 6,470878 | 4,328306 |  |  |  |  |
| 70C | 0,455857 | 5,462476 | 3,932249 |  |  |  |  |
| 71C | 0,211803 | 2,864507 | 2,905168 |  |  |  |  |
| 72C | -0,59136 | 4,638478 | 4,353258 |  |  |  |  |
| 73C | 1,382208 | 4,987899 | 3,001079 |  |  |  |  |
| 74C | 1,261445 | 3,694941 | 2,491996 |  |  |  |  |
| 75C | -0,71191 | 3,34795  | 3,841309 |  |  |  |  |
| 76H | -1,31397 | 5,003868 | 5,079021 |  |  |  |  |
| 77H | 2,199075 | 5,62504  | 2,67113  |  |  |  |  |
| 78H | 1,982582 | 3,318453 | 1,774487 |  |  |  |  |
| 79H | -1,51576 | 2,689905 | 4,153981 |  |  |  |  |
| 80C | 0,059672 | 1,459852 | 2,357614 |  |  |  |  |
| 81O | -0,93109 | 0,785991 | 2,752724 |  |  |  |  |
| 82O | 0,923834 | 1,032895 | 1,524794 |  |  |  |  |

**Table S3:** Atomic coordinates for complex **R3** and TBA<sub>2</sub>SO<sub>4</sub>.

|      |          |          |          |     |          |          |          |
|------|----------|----------|----------|-----|----------|----------|----------|
| Atom | X        | Y        | Z        | 31O | -3,25698 | 4,384861 | -0,60838 |
| 1O   | 5,96567  | -1,65861 | 0,046258 | 32C | 2,646957 | 3,545584 | 0,018678 |
| 2O   | 5,96255  | 1,68571  | 0,050655 | 33C | 2,549519 | -3,62118 | 0,149596 |
| 3N   | 3,098534 | -1,6151  | 1,615586 | 34O | 3,256424 | 4,366762 | -0,63876 |

|     |          |          |          |     |          |          |          |
|-----|----------|----------|----------|-----|----------|----------|----------|
| 4H  | 2,285752 | -1,25449 | 2,15821  | 35O | 2,989639 | -4,64407 | -0,34152 |
| 5N  | 3,090632 | 1,632789 | 1,60996  | 36N | 1,430556 | 2,985422 | -0,3138  |
| 6H  | 2,291287 | 1,280687 | 2,161869 | 37H | 0,987113 | 2,400344 | 0,40653  |
| 7C  | 3,926633 | -0,70289 | 1,136766 | 38N | 1,447997 | -2,93187 | -0,28854 |
| 8C  | 3,925338 | 0,722016 | 1,135055 | 39H | 1,116202 | -2,1272  | 0,250642 |
| 9C  | 5,246142 | 0,787612 | 0,424634 | 40C | -3,25878 | -3,05509 | 1,396877 |
| 10C | 5,248528 | -0,7627  | 0,424142 | 41H | -2,89875 | -3,59217 | 2,279949 |
| 11O | -5,95442 | -1,68499 | 0,043928 | 42H | -4,31543 | -3,28281 | 1,250437 |
| 12O | -5,96116 | 1,660193 | 0,042234 | 43C | -2,53364 | -3,63156 | 0,148479 |
| 13N | -3,09097 | -1,63028 | 1,618139 | 44O | -2,96775 | -4,65707 | -0,34259 |
| 14H | -2,28099 | -1,26725 | 2,162561 | 45N | -1,44835 | 2,976275 | -0,30925 |
| 15N | -3,09782 | 1,618944 | 1,614892 | 46H | -1,00672 | 2,379845 | 0,4026   |
| 16H | -2,29828 | 1,270746 | 2,16896  | 47N | -1,43836 | -2,93386 | -0,29184 |
| 17C | -3,92165 | -0,72085 | 1,138109 | 48H | -1,10705 | -2,13141 | 0,251382 |
| 18C | -3,92595 | 0,704024 | 1,136276 | 49H | -1,27043 | 4,065748 | -4,74684 |
| 19C | -5,24412 | 0,76442  | 0,42091  | 50C | -0,71989 | 3,84597  | -3,83724 |
| 20C | -5,24116 | -0,786   | 0,422152 | 51C | 0,703561 | 3,274343 | -1,48133 |
| 21C | 3,238133 | 3,060631 | 1,372635 | 52C | 0,683922 | 3,848404 | -3,84049 |
| 22H | 4,29527  | 3,327095 | 1,341404 | 53C | -1,41165 | 3,557057 | -2,67293 |
| 23H | 2,752388 | 3,593341 | 2,195179 | 54C | -0,72584 | 3,270658 | -1,47854 |
| 24C | 3,272938 | -3,03954 | 1,396677 | 55C | 1,382681 | 3,56298  | -2,67951 |
| 25H | 4,330478 | -3,26199 | 1,249382 | 56H | 1,229423 | 4,070534 | -4,75255 |
| 26H | 2,916994 | -3,57697 | 2,281018 | 57H | -2,49276 | 3,561693 | -2,66276 |
| 27C | -3,25441 | 3,046305 | 1,380282 | 58H | 2,463608 | 3,573237 | -2,67459 |

|     |          |          |          |     |          |          |          |
|-----|----------|----------|----------|-----|----------|----------|----------|
| 28H | -2,7797  | 3,580857 | 2,207844 | 59C | 0,714479 | -3,29778 | -1,44427 |
| 29H | -4,31343 | 3,304194 | 1,342343 | 60C | -0,69137 | -4,03872 | -3,75599 |
| 30C | -2,65749 | 3,544949 | 0,034073 | 61C | 1,401537 | -3,66428 | -2,61155 |
| 62C | -0,70144 | -3,29829 | -1,44574 |     |          |          |          |
| 63C | -1,38591 | -3,66463 | -2,61475 |     |          |          |          |
| 64C | 0,70948  | -4,0388  | -3,75422 |     |          |          |          |
| 65H | 2,484147 | -3,66577 | -2,60019 |     |          |          |          |
| 66H | -2,46859 | -3,66602 | -2,60573 |     |          |          |          |
| 67H | 1,259373 | -4,3264  | -4,64505 |     |          |          |          |
| 68H | -1,23922 | -4,32494 | -4,64866 |     |          |          |          |
| 69S | -0,0004  | 0,161963 | 2,070529 |     |          |          |          |
| 70O | 0,000522 | -0,72914 | 0,851481 |     |          |          |          |
| 71O | -0,00435 | 1,626805 | 1,656487 |     |          |          |          |
| 72O | -1,25085 | -0,08549 | 2,883953 |     |          |          |          |
| 73O | 1,253309 | -0,07926 | 2,881118 |     |          |          |          |

### NMR spectra of new compounds

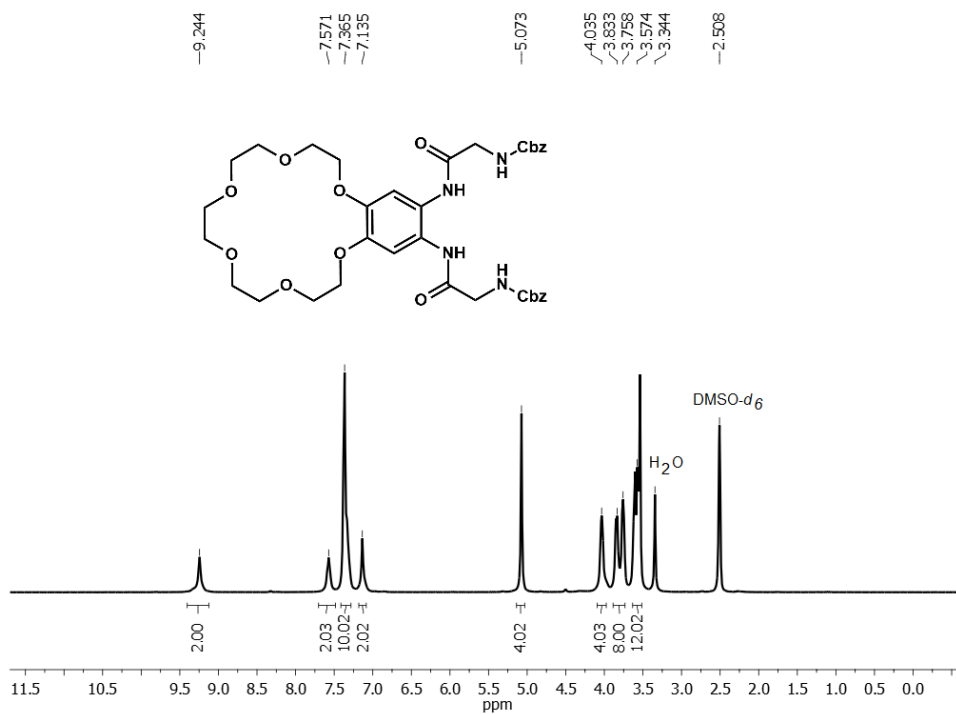

**Fig. S27.** <sup>1</sup>H NMR spectrum of **D1** in DMSO-d<sub>6</sub>.

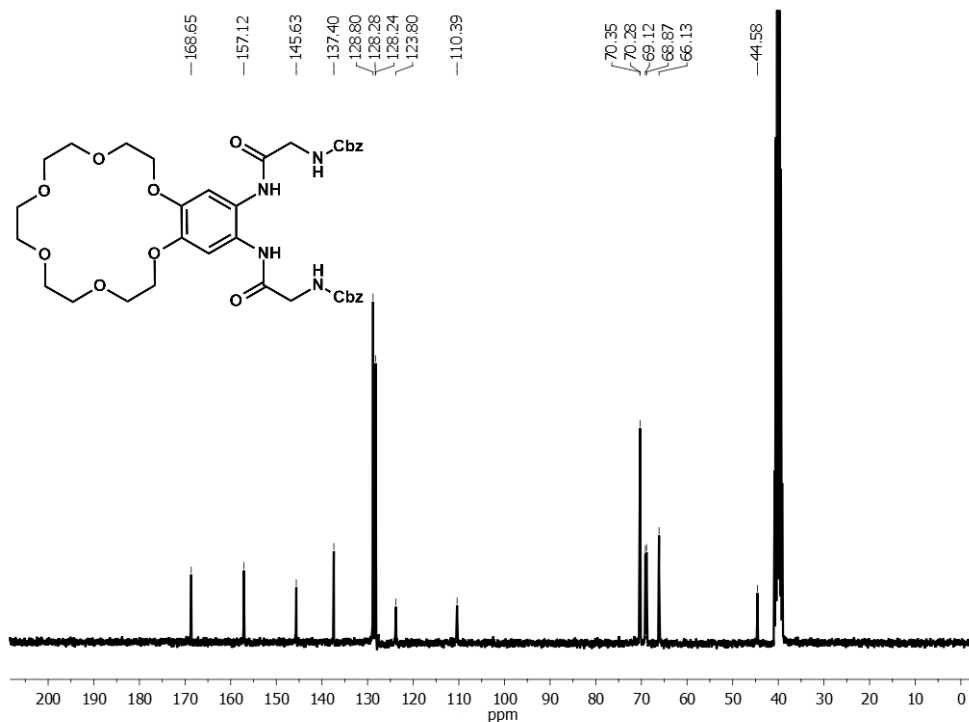

**Fig. S28.** <sup>13</sup>C NMR spectrum of **D1** in DMSO-d<sub>6</sub>.

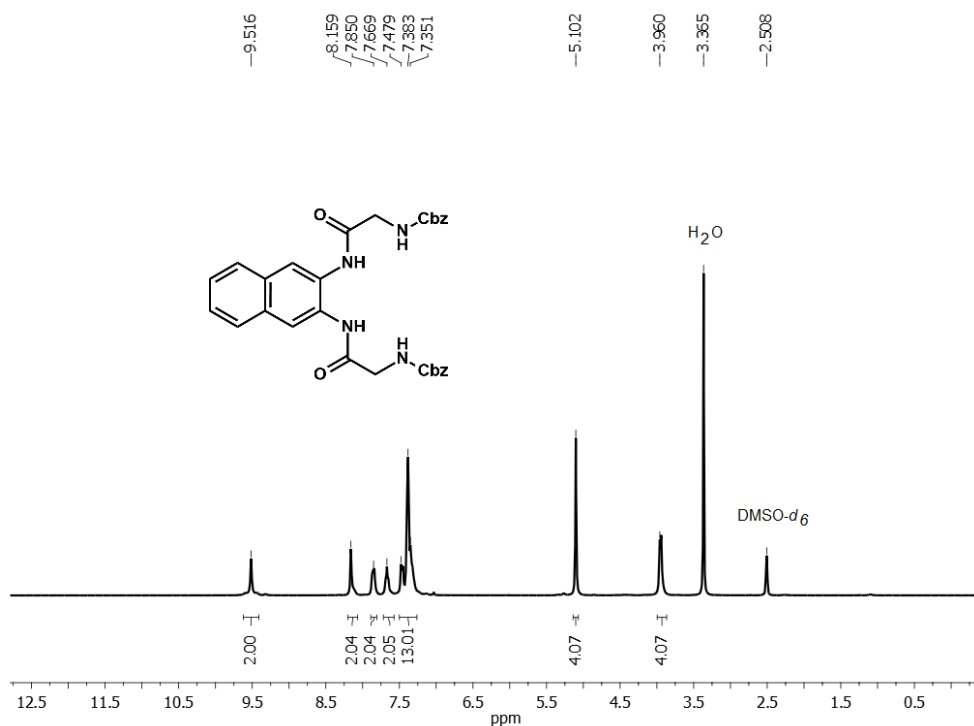

Fig. S29. <sup>1</sup>H NMR spectrum of **D3** in DMSO-d<sub>6</sub>.

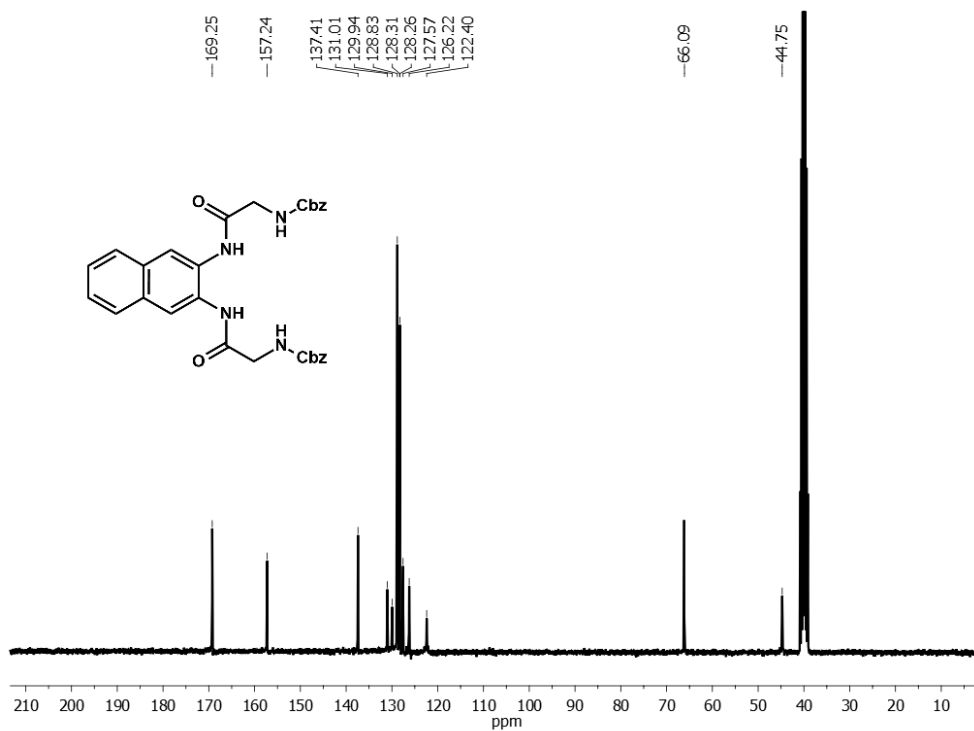

Fig. S30. <sup>13</sup>C NMR spectrum of **D3** in DMSO-d<sub>6</sub>.

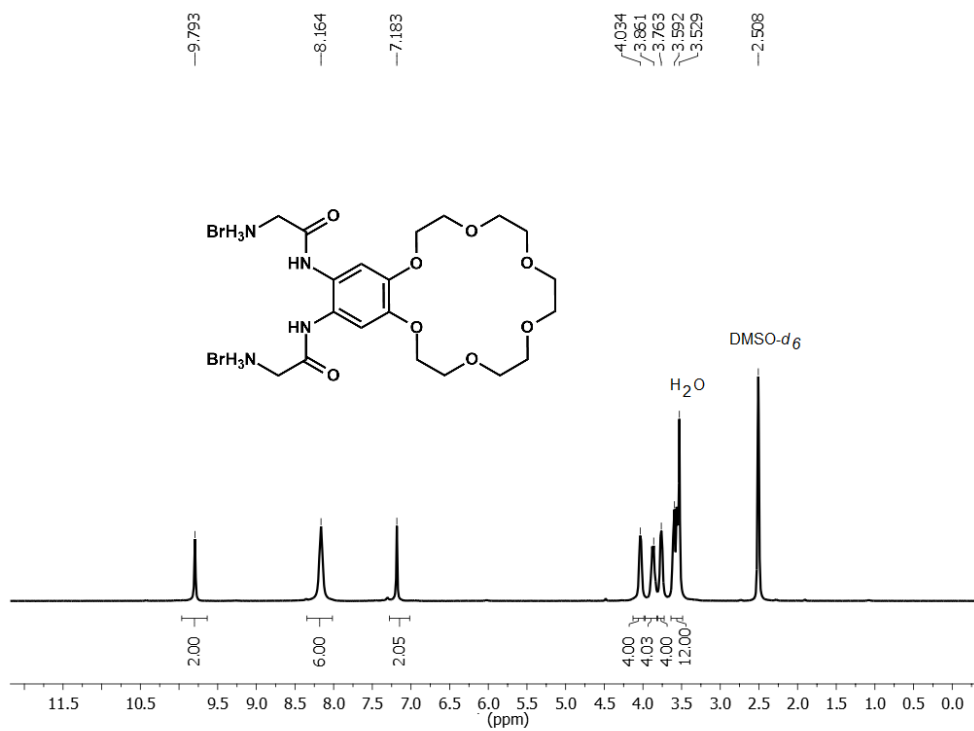

**Fig. S31.**  $^1\text{H}$  NMR spectrum of **A1** in DMSO- $d_6$ .

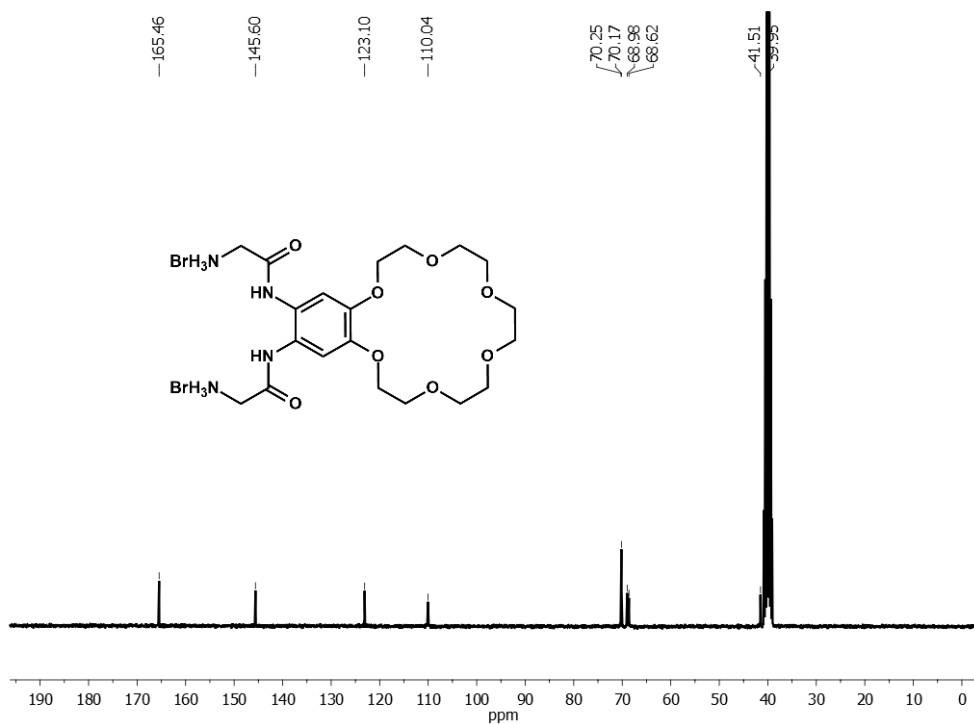

**Fig. S32.**  $^{13}\text{C}$  NMR spectrum of **A1** in DMSO- $d_6$ .



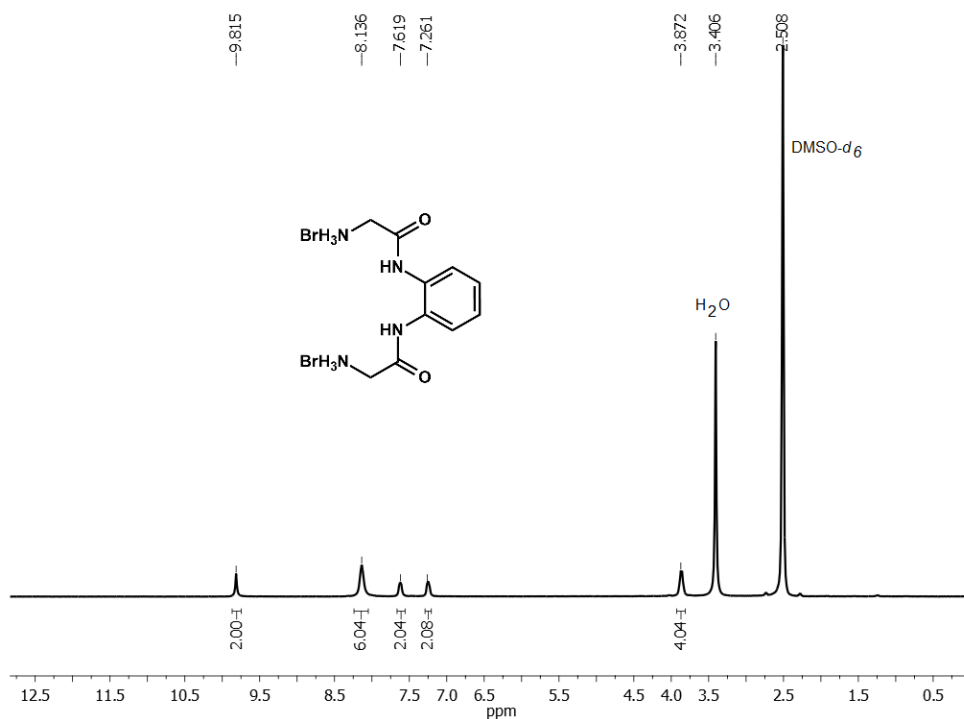

**Fig. S33.**  $^1\text{H}$  NMR spectrum of **A2** in  $\text{DMSO-d}_6$ .

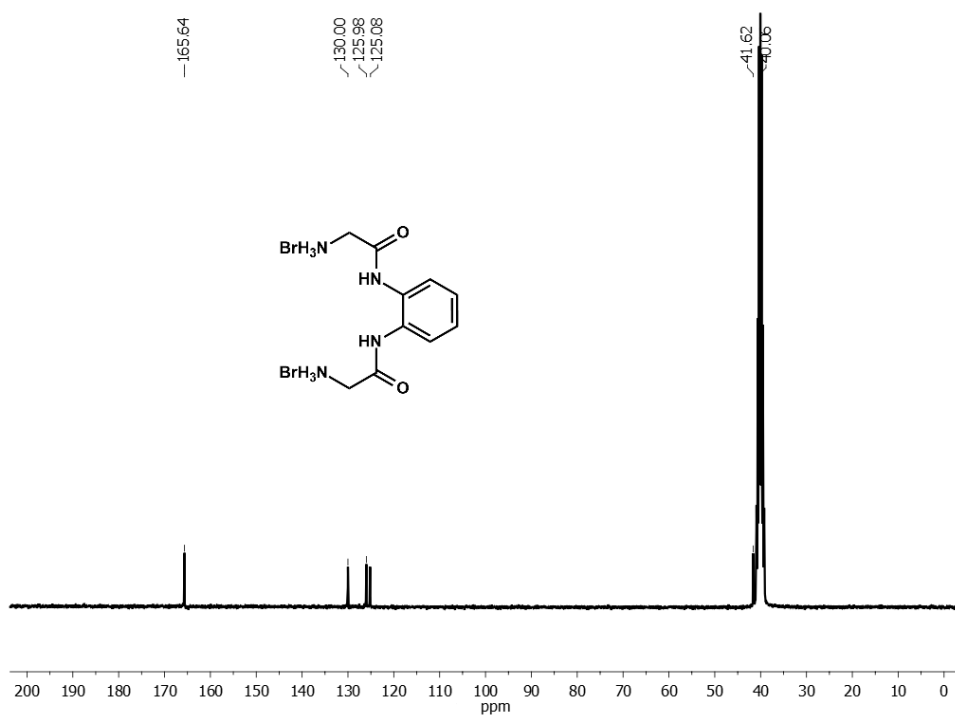

**Fig. S34.**  $^{13}\text{C}$  NMR spectrum of **A2** in  $\text{DMSO-d}_6$ .

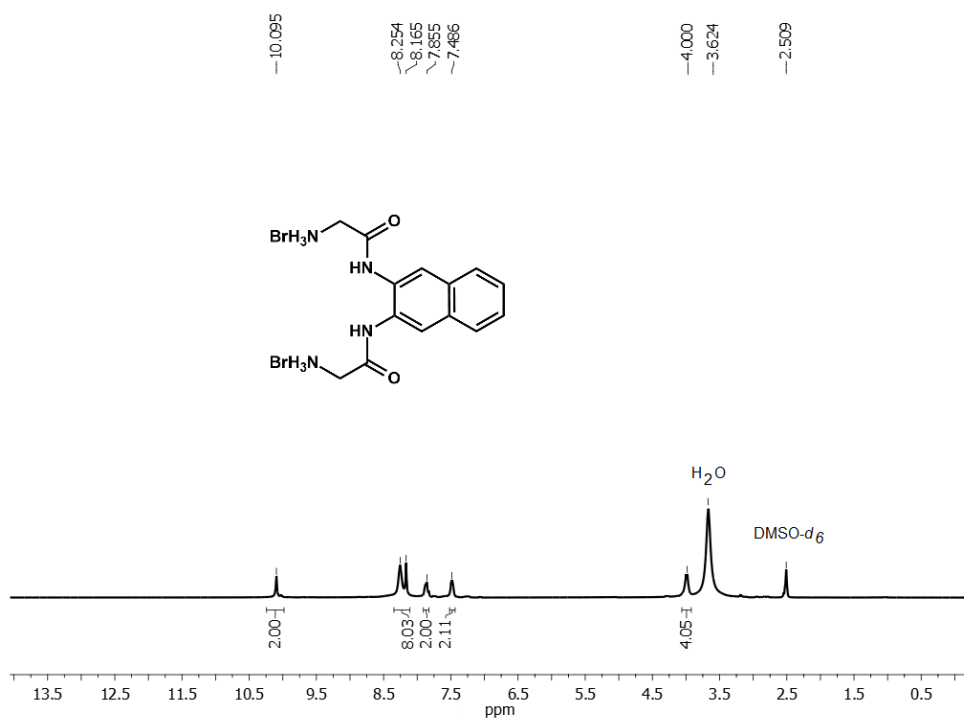

Fig. S35. <sup>1</sup>H NMR spectrum of **A3** in DMSO-*d*<sub>6</sub>.

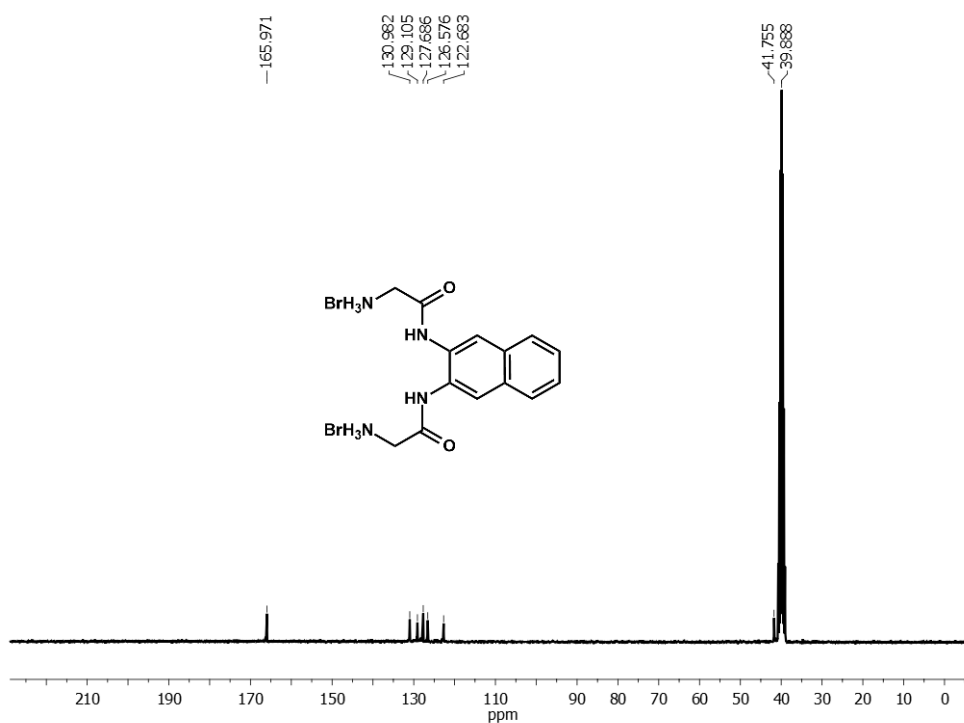

Fig. S36. <sup>13</sup>C NMR spectrum of **A3** in DMSO-*d*<sub>6</sub>.

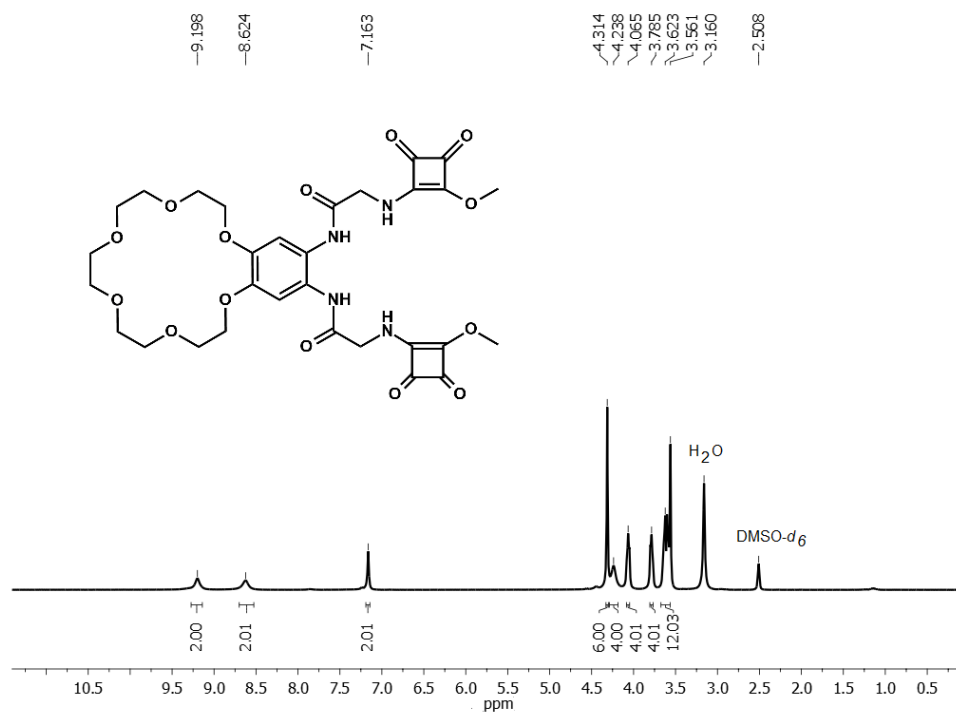

**Fig. S37.** <sup>1</sup>H NMR spectrum of **E1** in DMSO-*d*<sub>6</sub> (80°C).

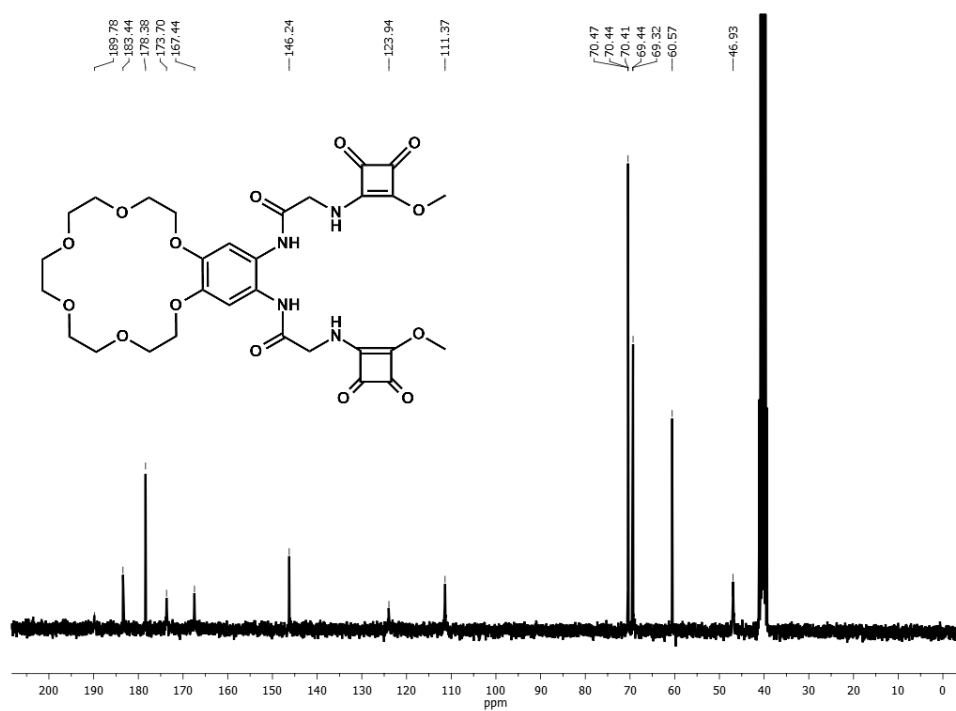

**Fig. S38.** <sup>13</sup>C NMR spectrum of **E1** in DMSO-*d*<sub>6</sub> (80°C).

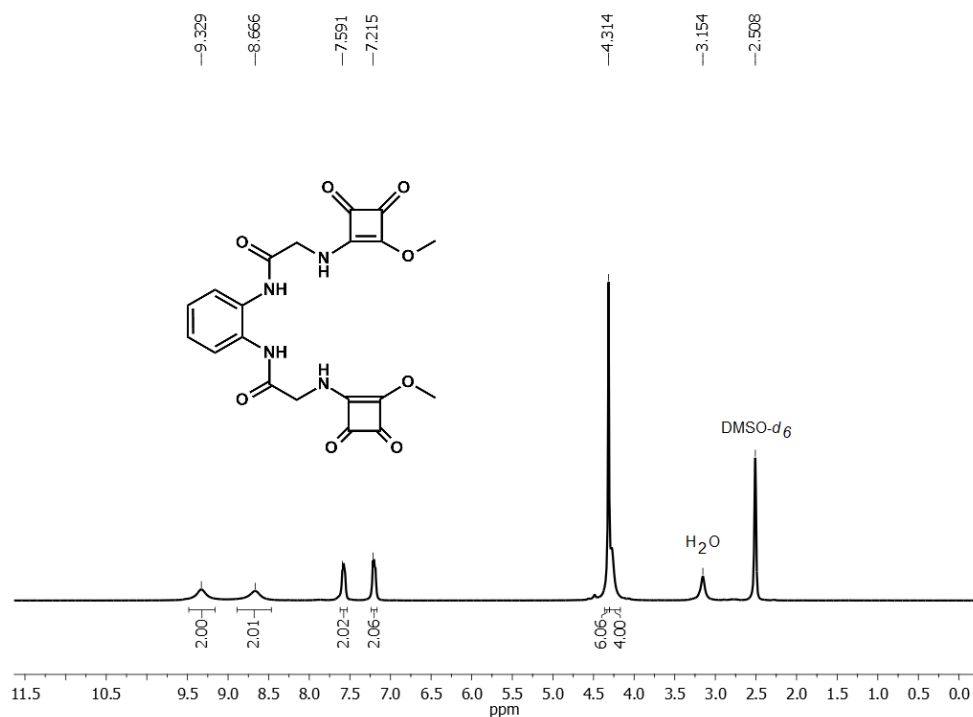

Fig. S39. <sup>1</sup>H NMR spectrum of E2 in DMSO-d<sub>6</sub> (80°C).

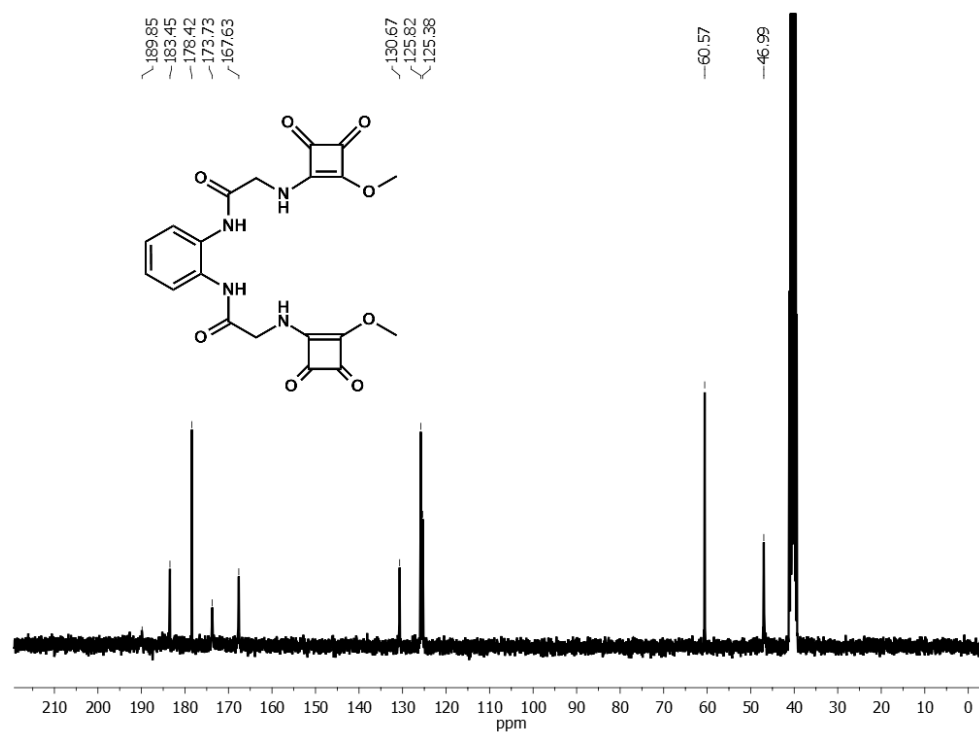

Fig. S40. <sup>13</sup>C NMR spectrum of E2 in DMSO-d<sub>6</sub> (80°C).

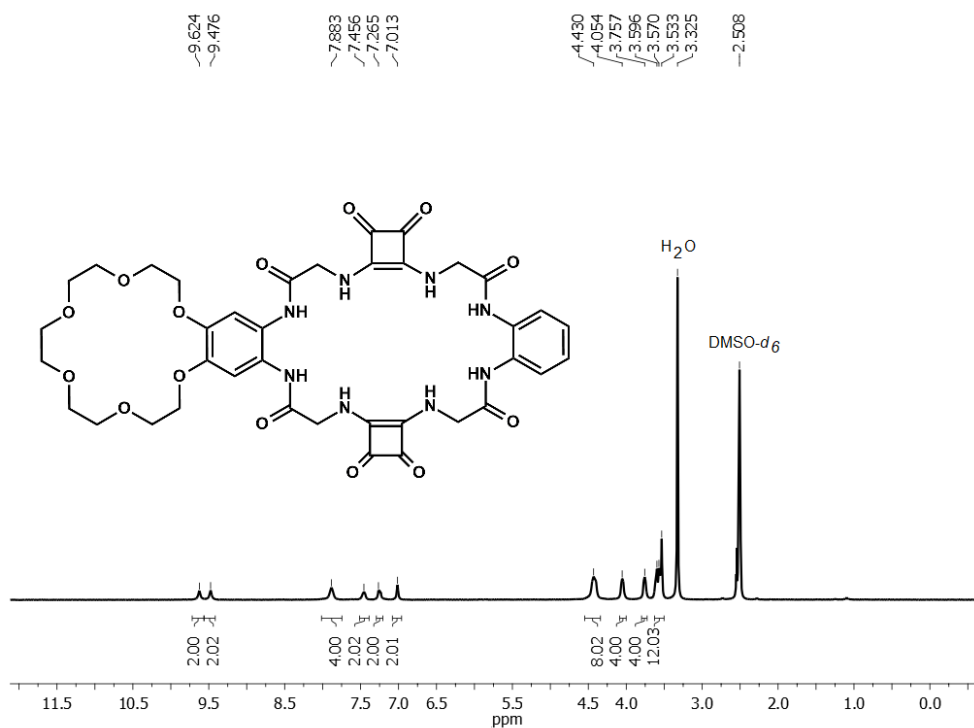

Fig. S41. <sup>1</sup>H NMR spectrum of R1 in DMSO-d<sub>6</sub>.

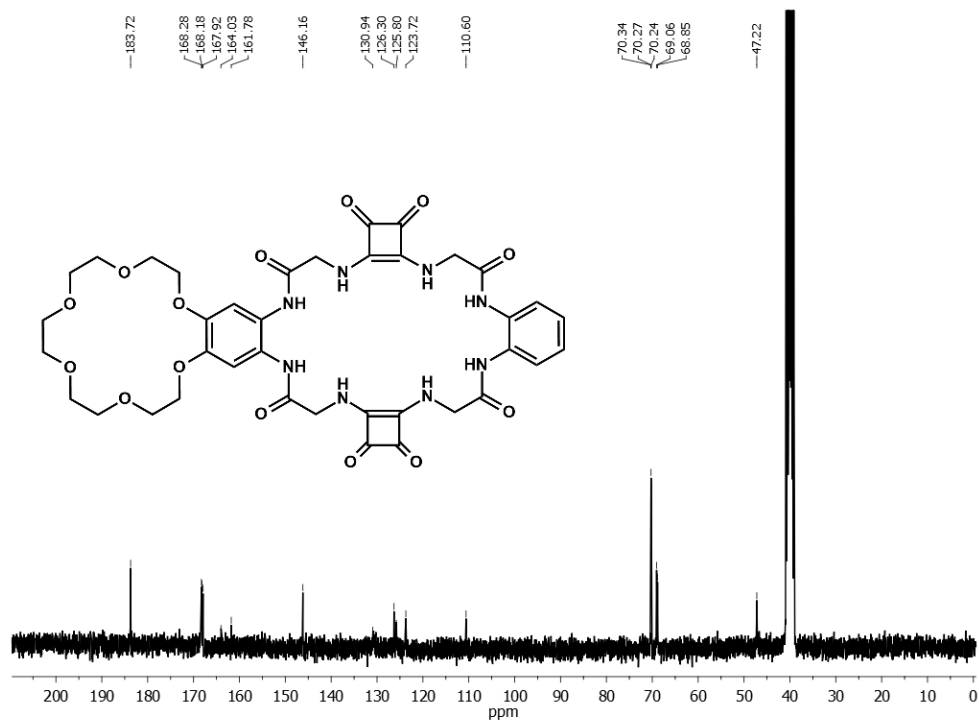

Fig. S42. <sup>13</sup>C NMR spectrum of R1 in DMSO-d<sub>6</sub>.

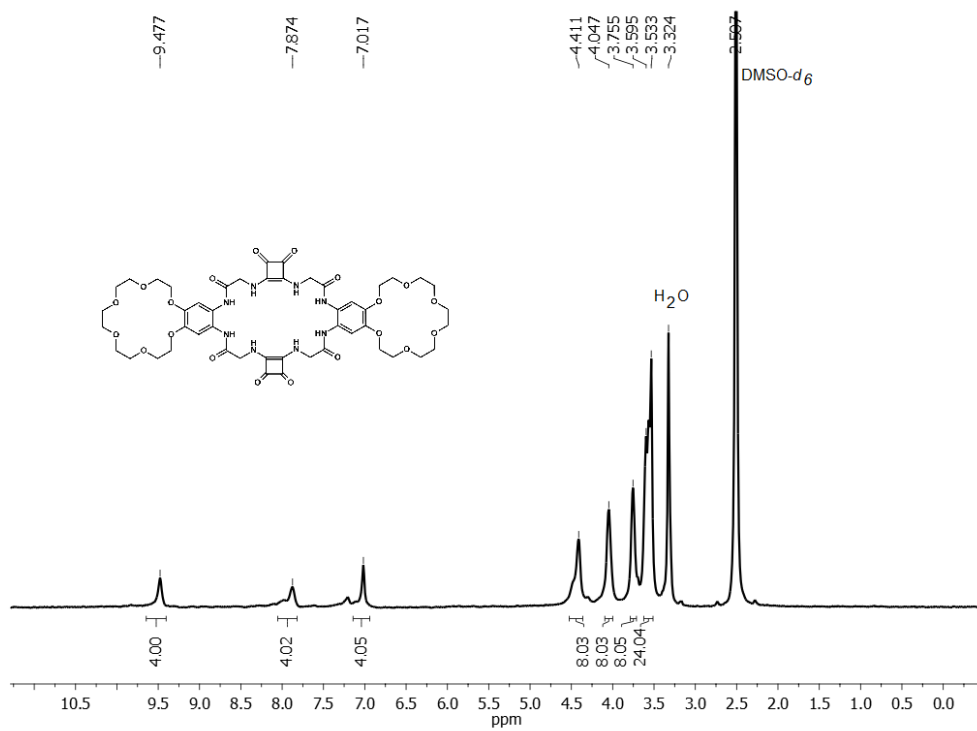

**Fig. S43.**  $^1\text{H}$  NMR spectrum of **R2** in  $\text{DMSO-d}_6$ .

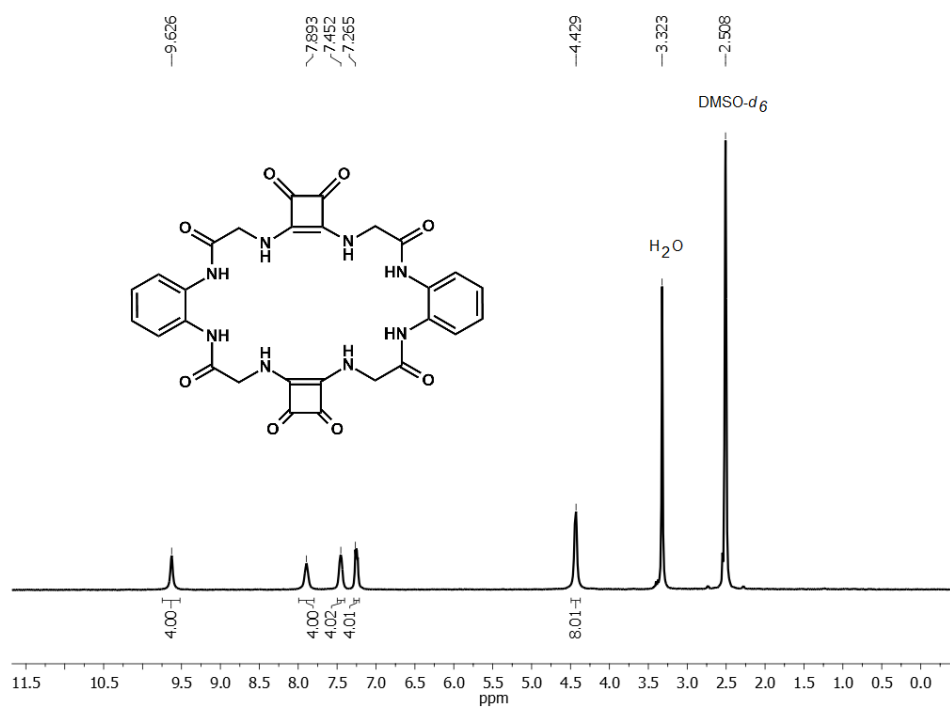

**Fig. S44.**  $^1\text{H}$  NMR spectrum of **R3** in  $\text{DMSO-d}_6$ .

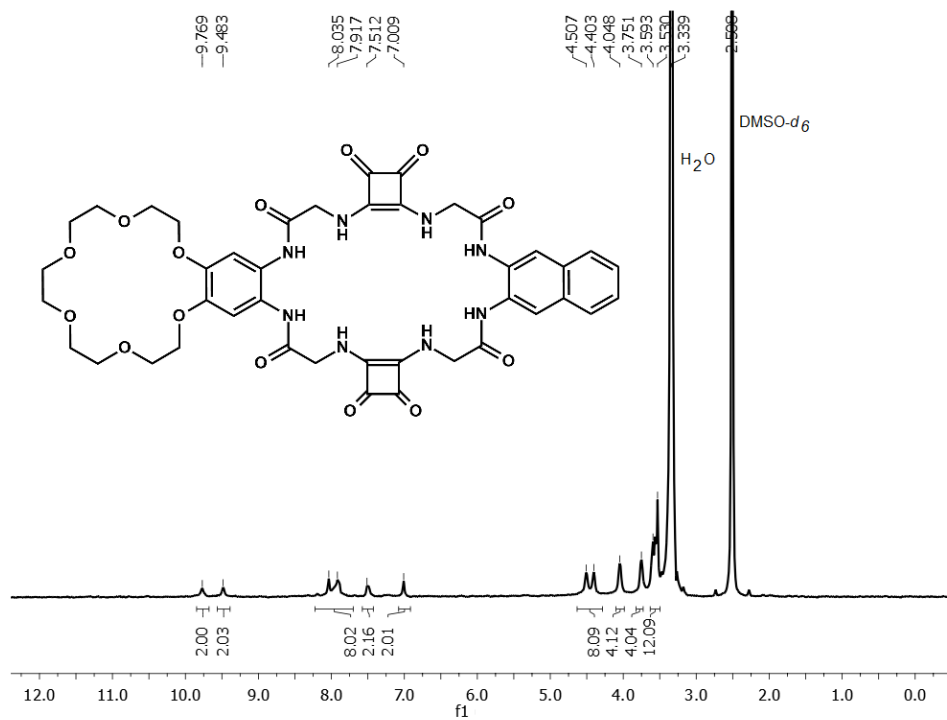

**Fig. S45.**  $^1\text{H}$  NMR spectrum of **R4** in  $\text{DMSO-d}_6$ .
